# Supplementary material for: Versatile and robust genome editing with Streptococcus thermophilus CRISPR1-Cas9
Source: PubMed Central journal article supplement — Genome Res. 2020 Jan;30(1):107–17. doi: 10.1101/gr.255414.119 (PMC6961573; doi:10.1101/gr.255414.119), 2020-01
Supplement: supp_gr.255414.119_Supplemental_Methods.pdf [file supp_gr.255414.119_Supplemental_Methods.pdf]

## **SUPPLEMENTAL METHODS**

### **Animal experiments (C57BL/6)**

Two days old neonatal *C57BL/6N* mice were injected intravenously in the retro-orbital sinus with 1E11 vector genome of rAAV8 targeting *Pck1* or saline in a total volume of 20  $\mu$ L. At 6 weeks of age, mice were fasted for 24 hours and sacrificed by cardiac puncture under anaesthesia using syringes conditioned with EDTA. Liver sections were snap frozen and fixed in 4% PFA for downstream applications. Plasma was stored at -80°C for further biochemical analyses.

### **Plasma triglycerides and NEFAs quantification**

Plasma metabolites were assayed in duplicate using the following commercial kits; triglycerides (Thermo Fisher Scientific, TR22421), NEFAs (Wako, 999-34691, 995-34791, 991-34891, 993-35191, 276-76491).

### **Hepatic triglyceride content extraction and measurement**

Hepatic triglycerides extraction was previously described in detail (Caron et al. 2017). Briefly, liver sections (25-50 mg) were homogenized in a 2:1 chloroform:methanol mixture, combined with methanol, and centrifuged for 15 min at 3,000 rpm. 825  $\mu$ l of supernatant was transferred to a new glass tube, chloroform and 0.73% NaCl was added, and the resulting mixture was centrifuged at 5,000 rpm for 3 min. The upper phase was discarded and the lower phase was washed 3 times with a 3/48/47 mixture of chloroform:methanol:NaCl (0.58%). The lower phase was then evaporated and resuspended in 1 ml of fresh isopropanol. Triglyceride levels were determined with a standard assay kit (Thermo Fisher Scientific, TR22421) according to the manufacturer's instructions.

### **Hepatic glycogen content extraction and measurement**

Glycogen was measured in liver samples as described (Lo et al. 1970). Briefly, glycogen was extracted in 30% KOH saturated with Na<sub>2</sub>SO<sub>4</sub>, precipitated in 95% ethanol, and re-suspended in distilled H<sub>2</sub>O. Absorbance at 490 nm was measured in triplicates, after addition of phenol and H<sub>2</sub>SO<sub>4</sub>.

### **Transcription reporter system**

K562 cells were transfected with M\_ST1n\_VPR (0.25 µg) (aka dSt1Cas9-VPR) (Chavez et al. 2015) (Addgene plasmid #63799, a gift from George Church), M-tdTom-ST1 (0.25 µg) (Addgene #48678, a gift from George Church), and the indicated amounts of M-ST1-sgRNA (v0) (Addgene #48672, a gift from George Church) (Esvelt et al. 2013). Where indicated, the sgRNA (v0) vector was exchanged for sgRNA (v1) (St1Cas9\_LMD-9\_sgRNA\_pUC19; Addgene plasmid #110627) containing the same guide. Empty pUC19 vectors were used to normalize DNA concentration in all transfections. Fluorescence microscopy images were taken with an EVOS FL Cell Imaging System 3 days post-transfection. The intensity and the frequency of cells expressing tdTomato were assessed with a BD LSR II flow cytometer 3 days post-transfection.

### **SUPPLEMENTAL REFERENCES**

Caron A, Mouchiroud M, Gautier N, Labbe SM, Villot R, Turcotte L, Secco B, Lamoureux G, Shum M, Gelinas Y et al. 2017. Loss of hepatic DEPTOR alters the metabolic transition to fasting. *Mol Metab* **6**: 447-458.

Chavez A, Scheiman J, Vora S, Pruitt BW, Tuttle M, E PRI, Lin S, Kiani S, Guzman CD, Wiegand DJ et al. 2015. Highly efficient Cas9-mediated transcriptional programming. *Nat Methods* **12**: 326-328.

Esvelt KM, Mali P, Braff JL, Moosburner M, Yaung SJ, Church GM. 2013. Orthogonal Cas9 proteins for RNA-guided gene regulation and editing. *Nat Methods* **10**: 1116-1121.

Lo S, Russell JC, Taylor AW. 1970. Determination of glycogen in small tissue samples. *J Appl Physiol* **28**: 234-236.
