# Supplementary material for: Versatile and robust genome editing with Streptococcus thermophilus CRISPR1-Cas9
Source: HighWire-hosted journal article supplement (doi:10.1101/gr.255414.119), 2020-01-01
Supplement: Supplemental_Tables.xlsx [file Supplemental_Tables.xlsx]

## Sheet: S1 (St1Cas9 LMD9)
ATGGGCGCCCCAAAGAAGAAGCGGAAGGTCGGTATCCACGGAGTCCCAGCAGCCAGCGACCTGGTGCTGGGCCTGGACAT
CGGCATCGGCAGCGTGGGCGTGGGCATCCTGAACAAGGTGACCGGCGAGATCATCCACAAGAACAGTCGCATCTTCCCTG
CTGCTCAGGCTGAGAACAACCTGGTGCGCCGCACCAACCGCCAGGGTCGCCGGCTTGCTCGCCGCAAGAAGCACCGGCGC
GTGCGCCTGAACCGCCTGTTCGAGGAGAGCGGCCTGATCACCGACTTCACCAAGATCAGCATCAACCTGAACCCCTACCA
GCTGCGCGTGAAGGGCCTGACCGACGAGCTGAGCAACGAGGAGCTGTTCATCGCCCTGAAGAACATGGTGAAGCACCGCG
GCATCAGCTACCTGGACGACGCCAGCGACGACGGCAACAGCAGCGTGGGCGACTACGCCCAGATCGTGAAGGAGAACAGC
AAGCAGCTGGAGACCAAGACCCCCGGCCAGATCCAGCTGGAGCGCTACCAGACCTACGGCCAGCTGCGCGGCGACTTCAC
CGTGGAGAAGGACGGCAAGAAGCACCGCCTGATCAACGTGTTCCCCACCAGCGCCTACCGCAGCGAGGCCCTGCGCATCC
TGCAGACCCAGCAGGAGTTCAACCCCCAGATCACCGACGAGTTCATCAACCGCTACCTGGAGATCCTGACCGGCAAGCGC
AAGTACTACCACGGCCCCGGCAACGAGAAGAGCCGCACCGACTACGGCCGCTACCGCACCAGCGGCGAGACCCTGGACAA
CATCTTCGGCATCCTGATCGGCAAGTGCACCTTCTACCCCGACGAGTTCCGCGCCGCCAAGGCCAGCTACACCGCCCAGG
AGTTCAATCTGCTGAACGACCTGAACAACCTGACCGTGCCCACCGAGACCAAGAAGCTGAGCAAGGAGCAGAAGAACCAG
ATCATCAACTACGTGAAGAACGAGAAGGCTATGGGCCCCGCCAAGCTGTTCAAGTACATCGCCAAGCTGCTGAGCTGCGA
CGTGGCCGACATCAAGGGCTACCGCATCGACAAGAGCGGCAAGGCCGAGATCCACACCTTCGAGGCCTACCGCAAGATGA
AGACCCTGGAGACCCTGGACATCGAGCAGATGGACCGAGAGACCCTGGACAAGCTGGCCTACGTGCTGACCCTGAACACC
GAGCGCGAGGGCATCCAGGAGGCCCTGGAGCACGAGTTCGCCGACGGCAGCTTCAGCCAGAAACAGGTGGACGAGCTGGT
GCAGTTCCGCAAGGCCAACAGCAGCATCTTCGGCAAGGGCTGGCACAACTTCAGCGTGAAGCTGATGATGGAGCTGATCC
CCGAGCTGTACGAGACCAGCGAGGAGCAGATGACCATCCTGACCCGCCTGGGCAAGCAGAAGACCACCAGCAGCAGCAAC
AAGACCAAGTACATCGACGAGAAGCTGCTGACCGAGGAGATCTACAACCCCGTGGTGGCCAAGAGCGTGCGCCAGGCCAT
CAAGATCGTGAACGCCGCCATCAAGGAGTACGGCGACTTCGACAACATCGTGATCGAGATGGCCCGCGAGACCAACGAGG
ACGACGAGAAGAAGGCCATCCAGAAGATCCAGAAGGCCAACAAGGACGAGAAGGACGCCGCCATGCTGAAGGCCGCCAAC
CAGTACAACGGCAAGGCCGAGCTGCCCCACAGCGTGTTCCACGGCCACAAGCAGCTGGCCACCAAGATCCGCCTGTGGCA
CCAGCAGGGCGAGCGCTGCCTGTACACCGGCAAGACCATCAGCATCCACGACCTGATCAACAACAGCAACCAGTTCGAGG
TGGACCACATCCTGCCCCTGAGCATCACCTTCGACGACAGCCTGGCCAACAAGGTGCTGGTGTACGCCACCGCCAACCAG
GAGAAGGGCCAGCGCACCCCCTACCAGGCCCTGGACAGCATGGACGACGCCTGGAGCTTCCGCGAGCTGAAGGCCTTCGT
GCGCGAGAGCAAGACCCTGAGCAACAAGAAGAAGGAGTATCTGCTGACCGAGGAGGACATCAGCAAGTTCGACGTGCGCA
AGAAGTTCATCGAGCGCAACCTGGTGGACACCCGCTACGCCAGCCGCGTGGTGCTGAACGCCCTGCAGGAGCACTTCCGC
GCCCACAAGATCGACACCAAGGTGAGCGTGGTGCGCGGCCAGTTCACCAGCCAGCTGCGCCGCCACTGGGGCATCGAGAA
GACCCGCGACACCTACCACCACCACGCCGTGGACGCCCTGATCATTGCGGCTTCTAGCCAGCTGAACCTGTGGAAGAAGC
AGAAGAACACCCTGGTGAGCTACAGCGAGGACCAGCTGCTGGACATCGAGACCGGCGAGCTGATCAGCGACGACGAGTAC
AAGGAGAGCGTGTTCAAGGCCCCCTACCAGCACTTCGTGGACACCCTGAAGAGCAAGGAGTTCGAGGACAGCATCCTGTT
CAGCTACCAGGTGGACAGCAAGTTCAACCGCAAGATCAGCGACGCCACCATCTACGCCACCCGCCAGGCCAAGGTGGGCA
AGGACAAGGCCGACGAGACCTACGTGCTGGGCAAGATCAAGGACATCTACACCCAGGACGGCTACGACGCCTTCATGAAG
ATCTACAAGAAGGACAAGAGCAAGTTCCTGATGTACCGCCACGACCCCCAGACCTTCGAGAAGGTGATCGAGCCCATCCT
GGAGAACTACCCCAACAAGCAGATCAACGAGAAAGGCAAGGAGGTGCCCTGCAACCCCTTCCTGAAGTACAAGGAGGAGC
ACGGCTACATCCGCAAGTACAGCAAGAAGGGCAACGGCCCCGAGATCAAGAGCCTGAAGTACTACGACAGCAAGCTGGGC
AACCACATCGACATCACCCCCAAGGACAGCAACAACAAGGTGGTGCTGCAGAGCGTGAGCCCCTGGCGCGCCGACGTGTA
CTTCAACAAGACCACCGGCAAGTACGAGATCCTGGGGCTGAAGTACGCCGATCTGCAGTTTGAGAAAGGCACAGGCACCT
ACAAGATCAGCCAGGAGAAGTACAACGACATCAAGAAGAAGGAGGGCGTGGACAGCGACAGCGAGTTCAAGTTCACCCTG
TACAAGAACGACCTTCTGCTGGTGAAGGACACCGAGACCAAGGAGCAACAGCTGTTCCGCTTCCTGAGCCGCACCATGCC
CAAGCAGAAGCACTACGTGGAGCTGAAGCCCTACGACAAGCAGAAGTTCGAGGGCGGCGAGGCCCTGATCAAGGTGCTGG
GCAACGTGGCCAACAGCGGCCAGTGCAAGAAGGGCCTGGGCAAGAGCAACATCAGCATCTACAAGGTGCGCACCGACGTG
CTGGGCAACCAGCACATCATCAAGAACGAGGGCGACAAGCCCAAGTTGGACTTCAGCAGGGCTGACCCCAAGAAGAAGAG
GAAGGTGTGA
MGAPKKKRKVGIHGVPAASDLVLGLDIGIGSVGVGILNKVTGEIIHKNSRIFPAAQAENNLVRRTNRQGRRLARRKKHRR
VRLNRLFEESGLITDFTKISINLNPYQLRVKGLTDELSNEELFIALKNMVKHRGISYLDDASDDGNSSVGDYAQIVKENS
KQLETKTPGQIQLERYQTYGQLRGDFTVEKDGKKHRLINVFPTSAYRSEALRILQTQQEFNPQITDEFINRYLEILTGKR
KYYHGPGNEKSRTDYGRYRTSGETLDNIFGILIGKCTFYPDEFRAAKASYTAQEFNLLNDLNNLTVPTETKKLSKEQKNQ
IINYVKNEKAMGPAKLFKYIAKLLSCDVADIKGYRIDKSGKAEIHTFEAYRKMKTLETLDIEQMDRETLDKLAYVLTLNT
EREGIQEALEHEFADGSFSQKQVDELVQFRKANSSIFGKGWHNFSVKLMMELIPELYETSEEQMTILTRLGKQKTTSSSN
KTKYIDEKLLTEEIYNPVVAKSVRQAIKIVNAAIKEYGDFDNIVIEMARETNEDDEKKAIQKIQKANKDEKDAAMLKAAN
QYNGKAELPHSVFHGHKQLATKIRLWHQQGERCLYTGKTISIHDLINNSNQFEVDHILPLSITFDDSLANKVLVYATANQ
EKGQRTPYQALDSMDDAWSFRELKAFVRESKTLSNKKKEYLLTEEDISKFDVRKKFIERNLVDTRYASRVVLNALQEHFR
AHKIDTKVSVVRGQFTSQLRRHWGIEKTRDTYHHHAVDALIIAASSQLNLWKKQKNTLVSYSEDQLLDIETGELISDDEY
KESVFKAPYQHFVDTLKSKEFEDSILFSYQVDSKFNRKISDATIYATRQAKVGKDKADETYVLGKIKDIYTQDGYDAFMK
IYKKDKSKFLMYRHDPQTFEKVIEPILENYPNKQINEKGKEVPCNPFLKYKEEHGYIRKYSKKGNGPEIKSLKYYDSKLG
NHIDITPKDSNNKVVLQSVSPWRADVYFNKTTGKYEILGLKYADLQFEKGTGTYKISQEKYNDIKKKEGVDSDSEFKFTL
YKNDLLLVKDTETKEQQLFRFLSRTMPKQKHYVELKPYDKQKFEGGEALIKVLGNVANSGQCKKGLGKSNISIYKVRTDV
LGNQHIIKNEGDKPKLDFSRADPKKKRKV
Supplemental Table S1. DNA and protein sequences for St1Cas9 LMD9 ORF.

## Sheet: S2 (St1Cas9 LMD9-LMG18311
ATGGGCGCCCCAAAGAAGAAGCGGAAGGTCGGTATCCACGGAGTCCCAGCAGCCAGCGACCTGGTGCTGGGCCTGGACAT
CGGCATCGGCAGCGTGGGCGTGGGCATCCTGAACAAGGTGACCGGCGAGATCATCCACAAGAACAGTCGCATCTTCCCTG
CTGCTCAGGCTGAGAACAACCTGGTGCGCCGCACCAACCGCCAGGGTCGCCGGCTTGCTCGCCGCAAGAAGCACCGGCGC
GTGCGCCTGAACCGCCTGTTCGAGGAGAGCGGCCTGATCACCGACTTCACCAAGATCAGCATCAACCTGAACCCCTACCA
GCTGCGCGTGAAGGGCCTGACCGACGAGCTGAGCAACGAGGAGCTGTTCATCGCCCTGAAGAACATGGTGAAGCACCGCG
GCATCAGCTACCTGGACGACGCCAGCGACGACGGCAACAGCAGCGTGGGCGACTACGCCCAGATCGTGAAGGAGAACAGC
AAGCAGCTGGAGACCAAGACCCCCGGCCAGATCCAGCTGGAGCGCTACCAGACCTACGGCCAGCTGCGCGGCGACTTCAC
CGTGGAGAAGGACGGCAAGAAGCACCGCCTGATCAACGTGTTCCCCACCAGCGCCTACCGCAGCGAGGCCCTGCGCATCC
TGCAGACCCAGCAGGAGTTCAACCCCCAGATCACCGACGAGTTCATCAACCGCTACCTGGAGATCCTGACCGGCAAGCGC
AAGTACTACCACGGCCCCGGCAACGAGAAGAGCCGCACCGACTACGGCCGCTACCGCACCAGCGGCGAGACCCTGGACAA
CATCTTCGGCATCCTGATCGGCAAGTGCACCTTCTACCCCGACGAGTTCCGCGCCGCCAAGGCCAGCTACACCGCCCAGG
AGTTCAATCTGCTGAACGACCTGAACAACCTGACCGTGCCCACCGAGACCAAGAAGCTGAGCAAGGAGCAGAAGAACCAG
ATCATCAACTACGTGAAGAACGAGAAGGCTATGGGCCCCGCCAAGCTGTTCAAGTACATCGCCAAGCTGCTGAGCTGCGA
CGTGGCCGACATCAAGGGCTACCGCATCGACAAGAGCGGCAAGGCCGAGATCCACACCTTCGAGGCCTACCGCAAGATGA
AGACCCTGGAGACCCTGGACATCGAGCAGATGGACCGAGAGACCCTGGACAAGCTGGCCTACGTGCTGACCCTGAACACC
GAGCGCGAGGGCATCCAGGAGGCCCTGGAGCACGAGTTCGCCGACGGCAGCTTCAGCCAGAAACAGGTGGACGAGCTGGT
GCAGTTCCGCAAGGCCAACAGCAGCATCTTCGGCAAGGGCTGGCACAACTTCAGCGTGAAGCTGATGATGGAGCTGATCC
CCGAGCTGTACGAGACCAGCGAGGAGCAGATGACCATCCTGACCCGCCTGGGCAAGCAGAAGACCACCAGCAGCAGCAAC
AAGACCAAGTACATCGACGAGAAGCTGCTGACCGAGGAGATCTACAACCCCGTGGTGGCCAAGAGCGTGCGCCAGGCCAT
CAAGATCGTGAACGCCGCCATCAAGGAGTACGGCGACTTCGACAACATCGTGATCGAGATGGCCCGCGAGACCAACGAGG
ACGACGAGAAGAAGGCCATCCAGAAGATCCAGAAGGCCAACAAGGACGAGAAGGACGCCGCCATGCTGAAGGCCGCCAAC
CAGTACAACGGCAAGGCCGAGCTGCCCCACAGCGTGTTCCACGGCCACAAGCAGCTGGCCACCAAGATCCGCCTGTGGCA
CCAGCAGGGCGAGCGCTGCCTGTACACCGGCAAGACCATCAGCATCCACGACCTGATCAACAACAGCAACCAGTTCGAGG
TGGACCACATCCTGCCCCTGAGCATCACCTTCGACGACAGCCTGGCCAACAAGGTGCTGGTGTACGCCACCGCCAACCAG
GAGAAGGGCCAGCGCACCCCCTACCAGGCCCTGGACAGCATGGACGACGCCTGGAGCTTCCGCGAGCTGAAGGCCTTCGT
GCGCGAGAGCAAGACCCTGAGCAACAAGAAGAAGGAGTATCTGCTGACCGAGGAGGACATCAGCAAGTTCGACGTGCGCA
AGAAGTTCATCGAGCGCAACCTGGTGGACACCCGCTACGCCAGCCGCGTGGTGCTGAACGCCCTGCAGGAGCACTTCCGC
GCCCACAAGATCGACACCAAGGTGAGCGTGGTGCGCGGCCAGTTCACCAGCCAGCTGCGCCGCCACTGGGGCATCGAGAA
GACCCGCGACACCTACCACCACCACGCCGTGGACGCCCTGATCATTGCGGCTTCTAGCCAGCTGAACCTGTGGAAGAAGC
AGAAGAACACCCTGGTGAGCTACAGCGAGGAgCAGCTGCTGGACATCGAGACCGGCGAGCTGATCAGCGACGACGAGTAC
AAGGAGAGCGTGTTCAAGGCCCCCTACCAGCACTTCGTGGACACCCTGAAGAGCAAGGAGTTCGAGGACAGCATCCTGTT
CAGCTACCAGGTGGACAGCAAGTTCAACCGCAAGATCAGCGACGCCACCATCTACGCCACCCGCCAGGCCAAGGTGGGCA
AGGACAAGaagGACGAGACCTACGTGCTGGGCAAGATCAAGGACATCTACACCCAGGACGGCTACGACGCCTTCATGAAG
ATCTACAAGAAGGACAAGAGCAAGTTCCTGATGTACCGCCACGACCCCCAGACCTTCGAGAAGGTGATCGAGCCCATCCT
GGAGAACTACCCCAACAAGCAGATgAACGAGAAAGGCAAGGAGGTGCCCTGCAACCCCTTCCTGAAGTACAAGGAGGAGC
ACGGCTACATCCGCAAGTACAGCAAGAAGGGCAACGGCCCCGAGATCAAGAGCCTGAAGTACTACGACAGCAAGCTGctg
GGCAACCcCATCGACATCACCCCCgAaaACAGCAAgAACAAGGTGGTGCTGCAGAGCcTtAagCCCTGGCGCaCCGACGT
GTACTTCAACAAGaaCACCGGCAAGTACGAGATCCTGGGGCTGAAGTACGCCGATCTGCAGTTTGAGAAAaagACAGGCA
CCTACAAGATCAGCCAGGAGAAGTACAACGgCATCAtGAAGgAGGAGGGCGTGGACAGCGACAGCGAGTTCAAGTTCACC
CTGTACAAGAACGACCTTCTGCTGGTGAAGGACACCGAGACCAAGGAGCAACAGCTGTTCCGCTTCCTGAGCCGCACCAT
GCCCAAcgtGAAGtACTACGTGGAGCTGAAGCCCTACagCAAGgAcAAGTTCGAGaagaaCGAGagCCTGATCgAGaTcC
TGGGCAgCGccGaCAAgAGCGGCagGTGCAtcAAGGGCCTGGGCAAGAGCAACATCAGCATCTACAAGGTGCGCACCGAC
GTGCTGGGCAACCAGCACATCATCAAGAACGAGGGCGACAAGCCCAAGTTGGACTTCAGCAGGGCTGACCCCAAGAAGAA
GAGGAAGGTGGGATCCTGA
MGAPKKKRKVGIHGVPAASDLVLGLDIGIGSVGVGILNKVTGEIIHKNSRIFPAAQAENNLVRRTNRQGRRLARRKKHRR
VRLNRLFEESGLITDFTKISINLNPYQLRVKGLTDELSNEELFIALKNMVKHRGISYLDDASDDGNSSVGDYAQIVKENS
KQLETKTPGQIQLERYQTYGQLRGDFTVEKDGKKHRLINVFPTSAYRSEALRILQTQQEFNPQITDEFINRYLEILTGKR
KYYHGPGNEKSRTDYGRYRTSGETLDNIFGILIGKCTFYPDEFRAAKASYTAQEFNLLNDLNNLTVPTETKKLSKEQKNQ
IINYVKNEKAMGPAKLFKYIAKLLSCDVADIKGYRIDKSGKAEIHTFEAYRKMKTLETLDIEQMDRETLDKLAYVLTLNT
EREGIQEALEHEFADGSFSQKQVDELVQFRKANSSIFGKGWHNFSVKLMMELIPELYETSEEQMTILTRLGKQKTTSSSN
KTKYIDEKLLTEEIYNPVVAKSVRQAIKIVNAAIKEYGDFDNIVIEMARETNEDDEKKAIQKIQKANKDEKDAAMLKAAN
QYNGKAELPHSVFHGHKQLATKIRLWHQQGERCLYTGKTISIHDLINNSNQFEVDHILPLSITFDDSLANKVLVYATANQ
EKGQRTPYQALDSMDDAWSFRELKAFVRESKTLSNKKKEYLLTEEDISKFDVRKKFIERNLVDTRYASRVVLNALQEHFR
AHKIDTKVSVVRGQFTSQLRRHWGIEKTRDTYHHHAVDALIIAASSQLNLWKKQKNTLVSYSEEQLLDIETGELISDDEY
KESVFKAPYQHFVDTLKSKEFEDSILFSYQVDSKFNRKISDATIYATRQAKVGKDKKDETYVLGKIKDIYTQDGYDAFMK
IYKKDKSKFLMYRHDPQTFEKVIEPILENYPNKQMNEKGKEVPCNPFLKYKEEHGYIRKYSKKGNGPEIKSLKYYDSKLL
GNPIDITPENSKNKVVLQSLKPWRTDVYFNKNTGKYEILGLKYADLQFEKKTGTYKISQEKYNGIMKEEGVDSDSEFKFT
LYKNDLLLVKDTETKEQQLFRFLSRTMPNVKYYVELKPYSKDKFEKNESLIEILGSADKSGRCIKGLGKSNISIYKVRTD
VLGNQHIIKNEGDKPKLDFSRADPKKKRKVGS
Supplemental Table S2. DNA and protein sequences for St1Cas9 LMD9-LMG18311 chimeric ORF.

## Sheet: S3 (St1Cas9 LMD9-CNRZ1066
ATGGGCGCCCCAAAGAAGAAGCGGAAGGTCGGTATCCACGGAGTCCCAGCAGCCAGCGACCTGGTGCTGGGCCTGGACAT
CGGCATCGGCAGCGTGGGCGTGGGCATCCTGAACAAGGTGACCGGCGAGATCATCCACAAGAACAGTCGCATCTTCCCTG
CTGCTCAGGCTGAGAACAACCTGGTGCGCCGCACCAACCGCCAGGGTCGCCGGCTTGCTCGCCGCAAGAAGCACCGGCGC
GTGCGCCTGAACCGCCTGTTCGAGGAGAGCGGCCTGATCACCGACTTCACCAAGATCAGCATCAACCTGAACCCCTACCA
GCTGCGCGTGAAGGGCCTGACCGACGAGCTGAGCAACGAGGAGCTGTTCATCGCCCTGAAGAACATGGTGAAGCACCGCG
GCATCAGCTACCTGGACGACGCCAGCGACGACGGCAACAGCAGCGTGGGCGACTACGCCCAGATCGTGAAGGAGAACAGC
AAGCAGCTGGAGACCAAGACCCCCGGCCAGATCCAGCTGGAGCGCTACCAGACCTACGGCCAGCTGCGCGGCGACTTCAC
CGTGGAGAAGGACGGCAAGAAGCACCGCCTGATCAACGTGTTCCCCACCAGCGCCTACCGCAGCGAGGCCCTGCGCATCC
TGCAGACCCAGCAGGAGTTCAACCCCCAGATCACCGACGAGTTCATCAACCGCTACCTGGAGATCCTGACCGGCAAGCGC
AAGTACTACCACGGCCCCGGCAACGAGAAGAGCCGCACCGACTACGGCCGCTACCGCACCAGCGGCGAGACCCTGGACAA
CATCTTCGGCATCCTGATCGGCAAGTGCACCTTCTACCCCGACGAGTTCCGCGCCGCCAAGGCCAGCTACACCGCCCAGG
AGTTCAATCTGCTGAACGACCTGAACAACCTGACCGTGCCCACCGAGACCAAGAAGCTGAGCAAGGAGCAGAAGAACCAG
ATCATCAACTACGTGAAGAACGAGAAGGCTATGGGCCCCGCCAAGCTGTTCAAGTACATCGCCAAGCTGCTGAGCTGCGA
CGTGGCCGACATCAAGGGCTACCGCATCGACAAGAGCGGCAAGGCCGAGATCCACACCTTCGAGGCCTACCGCAAGATGA
AGACCCTGGAGACCCTGGACATCGAGCAGATGGACCGAGAGACCCTGGACAAGCTGGCCTACGTGCTGACCCTGAACACC
GAGCGCGAGGGCATCCAGGAGGCCCTGGAGCACGAGTTCGCCGACGGCAGCTTCAGCCAGAAACAGGTGGACGAGCTGGT
GCAGTTCCGCAAGGCCAACAGCAGCATCTTCGGCAAGGGCTGGCACAACTTCAGCGTGAAGCTGATGATGGAGCTGATCC
CCGAGCTGTACGAGACCAGCGAGGAGCAGATGACCATCCTGACCCGCCTGGGCAAGCAGAAGACCACCAGCAGCAGCAAC
AAGACCAAGTACATCGACGAGAAGCTGCTGACCGAGGAGATCTACAACCCCGTGGTGGCCAAGAGCGTGCGCCAGGCCAT
CAAGATCGTGAACGCCGCCATCAAGGAGTACGGCGACTTCGACAACATCGTGATCGAGATGGCCCGCGAGACCAACGAGG
ACGACGAGAAGAAGGCCATCCAGAAGATCCAGAAGGCCAACAAGGACGAGAAGGACGCCGCCATGCTGAAGGCCGCCAAC
CAGTACAACGGCAAGGCCGAGCTGCCCCACAGCGTGTTCCACGGCCACAAGCAGCTGGCCACCAAGATCCGCCTGTGGCA
CCAGCAGGGCGAGCGCTGCCTGTACACCGGCAAGACCATCAGCATCCACGACCTGATCAACAACAGCAACCAGTTCGAGG
TGGACCACATCCTGCCCCTGAGCATCACCTTCGACGACAGCCTGGCCAACAAGGTGCTGGTGTACGCCACCGCCAACCAG
GAGAAGGGCCAGCGCACCCCCTACCAGGCCCTGGACAGCATGGACGACGCCTGGAGCTTCCGCGAGCTGAAGGCCTTCGT
GCGCGAGAGCAAGACCCTGAGCAACAAGAAGAAGGAGTATCTGCTGACCGAGGAGGACATCAGCAAGTTCGACGTGCGCA
AGAAGTTCATCGAGCGCAACCTGGTGGACACCCGCTACGCCAGCCGCGTGGTGCTGAACGCCCTGCAGGAGCACTTCCGC
GCCCACAAGATCGACACCAAGGTGAGCGTGGTGCGCGGCCAGTTCACCAGCCAGCTGCGCCGCCACTGGGGCATCGAGAA
GACCCGCGACACCTACCACCACCACGCCGTGGACGCCCTGATCATTGCGGCTTCTAGCCAGCTGAACCTGTGGAAGAAGC
AGAAGAACACCCTGGTGAGCTACAGCGAGGAgCAGCTGCTGGACATCGAGACCGGCGAGCTGATCAGCGACGACGAGTAC
AAGGAGAGCGTGTTCAAGGCCCCCTACCAGCACTTCGTGGACACCCTGAAGAGCAAGGAGTTCGAGGACAGCATCCTGTT
CAGCTACCAGGTGGACAGCAAGTTCAACCGCAAGATCAGCGACGCCACCATCTACGCCACCCGCCAGGCCAAGGTGGGCA
AGGACAAGaagGACGAGACCTACGTGCTGGGCAAGATCAAGGACATCTACACCCAGGACGGCTACGACGCCTTCATGAAG
ATCTACAAGAAGGACAAGAGCAAGTTCCTGATGTACCGCCACGACCCCCAGACCTTCGAGAAGGTGATCGAGCCCATCCT
GGAGAACTACCCCAACAAGCAGATgAACGAGAAAGGCAAGGAGGTGCCCTGCAACCCCTTCCTGAAGTACAAGGAGGAGC
ACGGCTACATCCGCAAGTACAGCAAGAAGGGCAACGGCCCCGAGATCAAGAGCCTGAAGTACTACGACAGCAAGCTGctg
GGCAACCcCATCGACATCACCCCCgAaaACAGCAAgAACAAGGTGGTGCTGCAGAGCcTtAagCCCTGGCGCaCCGACGT
GTACTTCAACAAGgCCACCGGCAAGTACGAGATCCTGGGGCTGAAGTACGCCGATCTGCAGTTTGAGAAAGGCACAGGCA
CCTACAAGATCAGCCAGGAGAAGTACAACGACATCAAGAAGAAGGAGGGCGTGGACAGCGACAGCGAGTTCAAGTTCACC
CTGTACAAGAACGACCTTCTGCTGGTGAAGGACACCGAGACCAAGGAGCAACAGCTGTTCCGCTTCCTGAGCCGCACCcT
GCCCAAGCAGAAGCACTACGTGGAGCTGAAGCCCTACGACAAGCAGAAGTTCGAGGGCGGCGAGGCCCTGATCAAGGTGC
TGGGCAACGTGGCCAACgGCGGCCAGTGCAtcAAGGGCCTGGcCAAGAGCAACATCAGCATCTACAAGGTGCGCACCGAC
GTGCTGGGCAACCAGCACATCATCAAGAACGAGGGCGACAAGCCCAAGTTGGACTTCAGCAGGGCTGACCCCAAGAAGAA
GAGGAAGGTGGGATCCTGA
MGAPKKKRKVGIHGVPAASDLVLGLDIGIGSVGVGILNKVTGEIIHKNSRIFPAAQAENNLVRRTNRQGRRLARRKKHRR
VRLNRLFEESGLITDFTKISINLNPYQLRVKGLTDELSNEELFIALKNMVKHRGISYLDDASDDGNSSVGDYAQIVKENS
KQLETKTPGQIQLERYQTYGQLRGDFTVEKDGKKHRLINVFPTSAYRSEALRILQTQQEFNPQITDEFINRYLEILTGKR
KYYHGPGNEKSRTDYGRYRTSGETLDNIFGILIGKCTFYPDEFRAAKASYTAQEFNLLNDLNNLTVPTETKKLSKEQKNQ
IINYVKNEKAMGPAKLFKYIAKLLSCDVADIKGYRIDKSGKAEIHTFEAYRKMKTLETLDIEQMDRETLDKLAYVLTLNT
EREGIQEALEHEFADGSFSQKQVDELVQFRKANSSIFGKGWHNFSVKLMMELIPELYETSEEQMTILTRLGKQKTTSSSN
KTKYIDEKLLTEEIYNPVVAKSVRQAIKIVNAAIKEYGDFDNIVIEMARETNEDDEKKAIQKIQKANKDEKDAAMLKAAN
QYNGKAELPHSVFHGHKQLATKIRLWHQQGERCLYTGKTISIHDLINNSNQFEVDHILPLSITFDDSLANKVLVYATANQ
EKGQRTPYQALDSMDDAWSFRELKAFVRESKTLSNKKKEYLLTEEDISKFDVRKKFIERNLVDTRYASRVVLNALQEHFR
AHKIDTKVSVVRGQFTSQLRRHWGIEKTRDTYHHHAVDALIIAASSQLNLWKKQKNTLVSYSEEQLLDIETGELISDDEY
KESVFKAPYQHFVDTLKSKEFEDSILFSYQVDSKFNRKISDATIYATRQAKVGKDKKDETYVLGKIKDIYTQDGYDAFMK
IYKKDKSKFLMYRHDPQTFEKVIEPILENYPNKQMNEKGKEVPCNPFLKYKEEHGYIRKYSKKGNGPEIKSLKYYDSKLL
GNPIDITPENSKNKVVLQSLKPWRTDVYFNKATGKYEILGLKYADLQFEKGTGTYKISQEKYNDIKKKEGVDSDSEFKFT
LYKNDLLLVKDTETKEQQLFRFLSRTLPKQKHYVELKPYDKQKFEGGEALIKVLGNVANGGQCIKGLAKSNISIYKVRTD
VLGNQHIIKNEGDKPKLDFSRADPKKKRKVGS
Supplemental Table S3. DNA and protein sequences for St1Cas9 LMD9-CNRZ1066 chimeric ORF.

## Sheet: S4 (St1Cas9 LMD9-TH1477)
ATGGGCGCCCCAAAGAAGAAGCGGAAGGTCGGTATCCACGGAGTCCCAGCAGCCAGCGACCTGGTGCTGGGCCTGGACAT
CGGCATCGGCAGCGTGGGCGTGGGCATCCTGAACAAGGTGACCGGCGAGATCATCCACAAGAACAGTCGCATCTTCCCTG
CTGCTCAGGCTGAGAACAACCTGGTGCGCCGCACCAACCGCCAGGGTCGCCGGCTTGCTCGCCGCAAGAAGCACCGGCGC
GTGCGCCTGAACCGCCTGTTCGAGGAGAGCGGCCTGATCACCGACTTCACCAAGATCAGCATCAACCTGAACCCCTACCA
GCTGCGCGTGAAGGGCCTGACCGACGAGCTGAGCAACGAGGAGCTGTTCATCGCCCTGAAGAACATGGTGAAGCACCGCG
GCATCAGCTACCTGGACGACGCCAGCGACGACGGCAACAGCAGCGTGGGCGACTACGCCCAGATCGTGAAGGAGAACAGC
AAGCAGCTGGAGACCAAGACCCCCGGCCAGATCCAGCTGGAGCGCTACCAGACCTACGGCCAGCTGCGCGGCGACTTCAC
CGTGGAGAAGGACGGCAAGAAGCACCGCCTGATCAACGTGTTCCCCACCAGCGCCTACCGCAGCGAGGCCCTGCGCATCC
TGCAGACCCAGCAGGAGTTCAACCCCCAGATCACCGACGAGTTCATCAACCGCTACCTGGAGATCCTGACCGGCAAGCGC
AAGTACTACCACGGCCCCGGCAACGAGAAGAGCCGCACCGACTACGGCCGCTACCGCACCAGCGGCGAGACCCTGGACAA
CATCTTCGGCATCCTGATCGGCAAGTGCACCTTCTACCCCGACGAGTTCCGCGCCGCCAAGGCCAGCTACACCGCCCAGG
AGTTCAATCTGCTGAACGACCTGAACAACCTGACCGTGCCCACCGAGACCAAGAAGCTGAGCAAGGAGCAGAAGAACCAG
ATCATCAACTACGTGAAGAACGAGAAGGCTATGGGCCCCGCCAAGCTGTTCAAGTACATCGCCAAGCTGCTGAGCTGCGA
CGTGGCCGACATCAAGGGCTACCGCATCGACAAGAGCGGCAAGGCCGAGATCCACACCTTCGAGGCCTACCGCAAGATGA
AGACCCTGGAGACCCTGGACATCGAGCAGATGGACCGAGAGACCCTGGACAAGCTGGCCTACGTGCTGACCCTGAACACC
GAGCGCGAGGGCATCCAGGAGGCCCTGGAGCACGAGTTCGCCGACGGCAGCTTCAGCCAGAAACAGGTGGACGAGCTGGT
GCAGTTCCGCAAGGCCAACAGCAGCATCTTCGGCAAGGGCTGGCACAACTTCAGCGTGAAGCTGATGATGGAGCTGATCC
CCGAGCTGTACGAGACCAGCGAGGAGCAGATGACCATCCTGACCCGCCTGGGCAAGCAGAAGACCACCAGCAGCAGCAAC
AAGACCAAGTACATCGACGAGAAGCTGCTGACCGAGGAGATCTACAACCCCGTGGTGGCCAAGAGCGTGCGCCAGGCCAT
CAAGATCGTGAACGCCGCCATCAAGGAGTACGGCGACTTCGACAACATCGTGATCGAGATGGCCCGCGAGACCAACGAGG
ACGACGAGAAGAAGGCCATCCAGAAGATCCAGAAGGCCAACAAGGACGAGAAGGACGCCGCCATGCTGAAGGCCGCCAAC
CAGTACAACGGCAAGGCCGAGCTGCCCCACAGCGTGTTCCACGGCCACAAGCAGCTGGCCACCAAGATCCGCCTGTGGCA
CCAGCAGGGCGAGCGCTGCCTGTACACCGGCAAGACCATCAGCATCCACGACCTGATCAACAACAGCAACCAGTTCGAGG
TGGACCACATCCTGCCCCTGAGCATCACCTTCGACGACAGCCTGGCCAACAAGGTGCTGGTGTACGCCACCGCCAACCAG
GAGAAGGGCCAGCGCACCCCCTACCAGGCCCTGGACAGCATGGACGACGCCTGGAGCTTCCGCGAGCTGAAGGCCTTCGT
GCGCGAGAGCAAGACCCTGAGCAACAAGAAGAAGGAGTATCTGCTGACCGAGGAGGACATCAGCAAGTTCGACGTGCGCA
AGAAGTTCATCGAGCGCAACCTGGTGGACACCCGCTACGCCAGCCGCGTGGTGCTGAACGCCCtgcaGGAGCACTTCCGC
GCCCACAAGATCGACACCAAGGTGAGCGTGGTGCGCGGCCAGTTCACCAGCCAGCTGCGCCGCCACTGGGGCATCGAGAA
GACCCGCGACACCTACCACCACCACGCCGTGGACGCCCTGATCATTGCGGCTTCTAGCCAGCTGAACCTGTGGAAGAAGC
AGAAGAACACCCTGGTGAGCTACAGCGAGGACCAGCTGCTGGACATCGAGACCGGCGAGCTGATCAGCGACGACGAGTAC
AAGGAGAGCGTGTTCAAGGCCCCCTACCAGCACTTCGTGGACACCCTGAAGAGCAAGGAGTTCGAGGACAGCATCCTGTT
CAGCTACCAGGTGGACAGCAAGTTCAACCGCAAGATCAGCGACGCCACCATCTACGCCACCCGCCAGGCCAAGGTGGGCA
AGGACAAGGCCGACGAGACCTACGTGCTGGGCAAGATCAAGGACATCTACACCCAGGACGGCTACGACGCCTTCATGAAG
ATCTACAAGAAGGACAAGAGCAAGTTCCTGATGTACCGCCACGACCCCCAGACCTTCGAGAAGGTGATCGAGCCCATCCT
GGAGAACTACCCCAACAAGCAGATCAACGAGAAAGGCAAGGAGGTGCCCTGCAACCCCTTCCTGAAGTACAAGGAGGAGC
ACGGCTACATCCGCAAGTACAGCAAGAAGGGCAACGGCCCCGAGATCAAGAGCCTGAAGTACTACGACAGCAAGCTGGGC
AACCACATCGACATCACCCCCAAGGACAGCAACAACAAGGTGGTGCTGCAGAGCcttaagCCCTGGCGCACCGACGTGTA
CTTCAACAAGAACACCGGCAAGTACGAGATCCTGGGGCTGAAGTACAGCGATATGCAGTTTGAGAAAGGCACAGGCAAGT
ACAGCATCAGCAAGGAGCAGTACGAGAACATCAAGGTGCGCGAGGGCGTGGACGAGAACAGCGAGTTCAAGTTCACCCTG
TACAAGAACGACCTTCTGCTGCTGAAGGACAGCGAGAACGGCGAGCAAATCCTGCTGCGCTTCACCAGCCGCAACGACAC
CAGCAAGCACTACGTGGAGCTGAAGCCCTACAACCGCCAGAAGTTCGAGGGCAGCGAGTACCTGATCAAGAGCCTGGGCA
CCGTGGTGAAGGGcGGCaGgTGCATCAAGGGCCTGGGCAAGAGCAACATCAGCATCTACAAGGTGCGCACCGACGTGCTG
GGCAACCAGCACATCATCAAGAACGAGGGCGACAAGCCCAAGTTGGACTTCAGCAGGGCTGACcccaagaagaagaggaa
ggtgGGATCCTGA
MGAPKKKRKVGIHGVPAASDLVLGLDIGIGSVGVGILNKVTGEIIHKNSRIFPAAQAENNLVRRTNRQGRRLARRKKHRR
VRLNRLFEESGLITDFTKISINLNPYQLRVKGLTDELSNEELFIALKNMVKHRGISYLDDASDDGNSSVGDYAQIVKENS
KQLETKTPGQIQLERYQTYGQLRGDFTVEKDGKKHRLINVFPTSAYRSEALRILQTQQEFNPQITDEFINRYLEILTGKR
KYYHGPGNEKSRTDYGRYRTSGETLDNIFGILIGKCTFYPDEFRAAKASYTAQEFNLLNDLNNLTVPTETKKLSKEQKNQ
IINYVKNEKAMGPAKLFKYIAKLLSCDVADIKGYRIDKSGKAEIHTFEAYRKMKTLETLDIEQMDRETLDKLAYVLTLNT
EREGIQEALEHEFADGSFSQKQVDELVQFRKANSSIFGKGWHNFSVKLMMELIPELYETSEEQMTILTRLGKQKTTSSSN
KTKYIDEKLLTEEIYNPVVAKSVRQAIKIVNAAIKEYGDFDNIVIEMARETNEDDEKKAIQKIQKANKDEKDAAMLKAAN
QYNGKAELPHSVFHGHKQLATKIRLWHQQGERCLYTGKTISIHDLINNSNQFEVDHILPLSITFDDSLANKVLVYATANQ
EKGQRTPYQALDSMDDAWSFRELKAFVRESKTLSNKKKEYLLTEEDISKFDVRKKFIERNLVDTRYASRVVLNALQEHFR
AHKIDTKVSVVRGQFTSQLRRHWGIEKTRDTYHHHAVDALIIAASSQLNLWKKQKNTLVSYSEDQLLDIETGELISDDEY
KESVFKAPYQHFVDTLKSKEFEDSILFSYQVDSKFNRKISDATIYATRQAKVGKDKADETYVLGKIKDIYTQDGYDAFMK
IYKKDKSKFLMYRHDPQTFEKVIEPILENYPNKQINEKGKEVPCNPFLKYKEEHGYIRKYSKKGNGPEIKSLKYYDSKLG
NHIDITPKDSNNKVVLQSLKPWRTDVYFNKNTGKYEILGLKYSDMQFEKGTGKYSISKEQYENIKVREGVDENSEFKFTL
YKNDLLLLKDSENGEQILLRFTSRNDTSKHYVELKPYNRQKFEGSEYLIKSLGTVVKGGRCIKGLGKSNISIYKVRTDVL
GNQHIIKNEGDKPKLDFSRADPKKKRKVGS
Supplemental Table S4. DNA and protein sequences for St1Cas9 LMD9-TH1477 chimeric ORF.

## Sheet: S5 (St1Cas9 LMD9-MTH17CL396)
ATGGGCGCCCCAAAGAAGAAGCGGAAGGTCGGTATCCACGGAGTCCCAGCAGCCAGCGACCTGGTGCTGGGCCTGGACAT
CGGCATCGGCAGCGTGGGCGTGGGCATCCTGAACAAGGTGACCGGCGAGATCATCCACAAGAACAGTCGCATCTTCCCTG
CTGCTCAGGCTGAGAACAACCTGGTGCGCCGCACCAACCGCCAGGGTCGCCGGCTTGCTCGCCGCAAGAAGCACCGGCGC
GTGCGCCTGAACCGCCTGTTCGAGGAGAGCGGCCTGATCACCGACTTCACCAAGATCAGCATCAACCTGAACCCCTACCA
GCTGCGCGTGAAGGGCCTGACCGACGAGCTGAGCAACGAGGAGCTGTTCATCGCCCTGAAGAACATGGTGAAGCACCGCG
GCATCAGCTACCTGGACGACGCCAGCGACGACGGCAACAGCAGCGTGGGCGACTACGCCCAGATCGTGAAGGAGAACAGC
AAGCAGCTGGAGACCAAGACCCCCGGCCAGATCCAGCTGGAGCGCTACCAGACCTACGGCCAGCTGCGCGGCGACTTCAC
CGTGGAGAAGGACGGCAAGAAGCACCGCCTGATCAACGTGTTCCCCACCAGCGCCTACCGCAGCGAGGCCCTGCGCATCC
TGCAGACCCAGCAGGAGTTCAACCCCCAGATCACCGACGAGTTCATCAACCGCTACCTGGAGATCCTGACCGGCAAGCGC
AAGTACTACCACGGCCCCGGCAACGAGAAGAGCCGCACCGACTACGGCCGCTACCGCACCAGCGGCGAGACCCTGGACAA
CATCTTCGGCATCCTGATCGGCAAGTGCACCTTCTACCCCGACGAGTTCCGCGCCGCCAAGGCCAGCTACACCGCCCAGG
AGTTCAATCTGCTGAACGACCTGAACAACCTGACCGTGCCCACCGAGACCAAGAAGCTGAGCAAGGAGCAGAAGAACCAG
ATCATCAACTACGTGAAGAACGAGAAGGCTATGGGCCCCGCCAAGCTGTTCAAGTACATCGCCAAGCTGCTGAGCTGCGA
CGTGGCCGACATCAAGGGCTACCGCATCGACAAGAGCGGCAAGGCCGAGATCCACACCTTCGAGGCCTACCGCAAGATGA
AGACCCTGGAGACCCTGGACATCGAGCAGATGGACCGAGAGACCCTGGACAAGCTGGCCTACGTGCTGACCCTGAACACC
GAGCGCGAGGGCATCCAGGAGGCCCTGGAGCACGAGTTCGCCGACGGCAGCTTCAGCCAGAAACAGGTGGACGAGCTGGT
GCAGTTCCGCAAGGCCAACAGCAGCATCTTCGGCAAGGGCTGGCACAACTTCAGCGTGAAGCTGATGATGGAGCTGATCC
CCGAGCTGTACGAGACCAGCGAGGAGCAGATGACCATCCTGACCCGCCTGGGCAAGCAGAAGACCACCAGCAGCAGCAAC
AAGACCAAGTACATCGACGAGAAGCTGCTGACCGAGGAGATCTACAACCCCGTGGTGGCCAAGAGCGTGCGCCAGGCCAT
CAAGATCGTGAACGCCGCCATCAAGGAGTACGGCGACTTCGACAACATCGTGATCGAGATGGCCCGCGAGACCAACGAGG
ACGACGAGAAGAAGGCCATCCAGAAGATCCAGAAGGCCAACAAGGACGAGAAGGACGCCGCCATGCTGAAGGCCGCCAAC
CAGTACAACGGCAAGGCCGAGCTGCCCCACAGCGTGTTCCACGGCCACAAGCAGCTGGCCACCAAGATCCGCCTGTGGCA
CCAGCAGGGCGAGCGCTGCCTGTACACCGGCAAGACCATCAGCATCCACGACCTGATCAACAACAGCAACCAGTTCGAGG
TGGACCACATCCTGCCCCTGAGCATCACCTTCGACGACAGCCTGGCCAACAAGGTGCTGGTGTACGCCACCGCCAACCAG
GAGAAGGGCCAGCGCACCCCCTACCAGGCCCTGGACAGCATGGACGACGCCTGGAGCTTCCGCGAGCTGAAGGCCTTCGT
GCGCGAGAGCAAGACCCTGAGCAACAAGAAGAAGGAGTATCTGCTGACCGAGGAGGACATCAGCAAGTTCGACGTGCGCA
AGAAGTTCATCGAGCGCAACCTGGTGGACACCCGCTACGCCAGCCGCGTGGTGCTGAACGCCCtgcaGGAGCACTTCCGC
GCCCACAAGATCGACACCAAGGTGAGCGTGGTGCGCGGCCAGTTCACCAGCCAGCTGCGCCGCCACTGGGGCATCGAGAA
GACCCGCGACACCTACCACCACCACGCCGTGGACGCCCTGATCATTGCGGCTTCTAGCCAGCTGAACCTGTGGAAGAAGC
AGAAGAACACCCTGGTGAGCTACAGCGAGGACCAGCTGCTGGACATCGAGACCGGCGAGCTGATCAGCGACGACGAGTAC
AAGGAGAGCGTGTTCAAGGCCCCCTACCAGCACTTCGTGGACACCCTGAAGAGCAAGGAGTTCGAGGACAGCATCCTGTT
CAGCTACCAGGTGGACAGCAAGTTCAACCGCAAGATCAGCGACGCCACCATCTACGCCACCCGCCAGGCCAAGGTGGGCA
AGGACAAGGCCGACGAGACCTACGTGCTGGGCAAGATCAAGGACATCTACACCCAGGACGGCTACGACGCCTTCATGAAG
ATCTACAAGAAGGACAAGAGCAAGTTCCTGATGTACCGCCACGACCCCCAGACCTTCGAGAAGGTGATCGAGCCCATCCT
GGAGAACTACCCCAACAAGCAGATCAACGAGAAAGGCAAGGAGGTGCCCTGCAACCCCTTCCTGAAGTACAAGGAGGAGC
ACGGCTACATCCGCAAGTACAGCAAGAAGGGCAACGGCCCCGAGATCAAGAGCCTGAAGTACTACGACAGCAAGCTGGGC
AACCACATCGACATCACCCCCAAGGACAGCAACAACAAGGTGGTGCTGCAGAGCcttaagCCCTGGCGCACCGACGTGTA
CTTCAACAAGAACACCGGCAAGTACGAGATCCTGGGGCTGAAGTACAGCGATATGCAGTTTGAGAAAGGCACAGGCAAGT
ACAGCATCAGCAAGGAGCAGTACGAGAACATCAAGGTGCGCGAGGGCGTGGACGAGAACAGCGAGTTCAAGTTCACCCTG
TACAAGAACGACCTTCTGCTGCTGAAGGACAGCGAGAACGGCGAGCAAATCCTGCTGCGCTTCACCAGCCGCAACGACAC
CAGCAAGCACTACGTGGAGCTGAAGCCCTACAACCGCCAGAAGTTCGAGGGCAGCGAGTACCTGATCAAGAGCCTGGGCA
CCGTGGCCAAGGGcGGCCAGTGCATCAAGGGCCTGGGCAAGAGCAACATCAGCATCTACAAGGTGCGCACCGACGTGCTG
GGCAACCAGCACATCATCAAGAACGAGGGCGACAAGCCCAAGTTGGACTTCAGCAGGGCTGACcccaagaagaagaggaa
ggtgGGATCCTGA
MGAPKKKRKVGIHGVPAASDLVLGLDIGIGSVGVGILNKVTGEIIHKNSRIFPAAQAENNLVRRTNRQGRRLARRKKHRR
VRLNRLFEESGLITDFTKISINLNPYQLRVKGLTDELSNEELFIALKNMVKHRGISYLDDASDDGNSSVGDYAQIVKENS
KQLETKTPGQIQLERYQTYGQLRGDFTVEKDGKKHRLINVFPTSAYRSEALRILQTQQEFNPQITDEFINRYLEILTGKR
KYYHGPGNEKSRTDYGRYRTSGETLDNIFGILIGKCTFYPDEFRAAKASYTAQEFNLLNDLNNLTVPTETKKLSKEQKNQ
IINYVKNEKAMGPAKLFKYIAKLLSCDVADIKGYRIDKSGKAEIHTFEAYRKMKTLETLDIEQMDRETLDKLAYVLTLNT
EREGIQEALEHEFADGSFSQKQVDELVQFRKANSSIFGKGWHNFSVKLMMELIPELYETSEEQMTILTRLGKQKTTSSSN
KTKYIDEKLLTEEIYNPVVAKSVRQAIKIVNAAIKEYGDFDNIVIEMARETNEDDEKKAIQKIQKANKDEKDAAMLKAAN
QYNGKAELPHSVFHGHKQLATKIRLWHQQGERCLYTGKTISIHDLINNSNQFEVDHILPLSITFDDSLANKVLVYATANQ
EKGQRTPYQALDSMDDAWSFRELKAFVRESKTLSNKKKEYLLTEEDISKFDVRKKFIERNLVDTRYASRVVLNALQEHFR
AHKIDTKVSVVRGQFTSQLRRHWGIEKTRDTYHHHAVDALIIAASSQLNLWKKQKNTLVSYSEDQLLDIETGELISDDEY
KESVFKAPYQHFVDTLKSKEFEDSILFSYQVDSKFNRKISDATIYATRQAKVGKDKADETYVLGKIKDIYTQDGYDAFMK
IYKKDKSKFLMYRHDPQTFEKVIEPILENYPNKQINEKGKEVPCNPFLKYKEEHGYIRKYSKKGNGPEIKSLKYYDSKLG
NHIDITPKDSNNKVVLQSLKPWRTDVYFNKNTGKYEILGLKYSDMQFEKGTGKYSISKEQYENIKVREGVDENSEFKFTL
YKNDLLLLKDSENGEQILLRFTSRNDTSKHYVELKPYNRQKFEGSEYLIKSLGTVAKGGQCIKGLGKSNISIYKVRTDVL
GNQHIIKNEGDKPKLDFSRADPKKKRKVGS
Supplemental Table S5. DNA and protein sequences for St1Cas9 LMD9-MTH17CL396 chimeric ORF.

## Sheet: S6 (St1BE4max LMD9)
ATGAAACGGACAGCCGACGGAAGCGAGTTCGAGTCACCAAAGAAGAAGCGGAAAGTCTCCTCAGAGACTGGGCCTGTCGC
CGTCGATCCAACCCTGCGCCGCCGGATTGAACCTCACGAGTTTGAAGTGTTCTTTGACCCCCGGGAGCTGAGAAAGGAGA
CATGCCTGCTGTACGAGATCAACTGGGGAGGCAGGCACTCCATCTGGAGGCACACCTCTCAGAACACAAATAAGCACGTG
GAGGTGAACTTCATCGAGAAGTTTACCACAGAGCGGTACTTCTGCCCCAATACCAGATGTAGCATCACATGGTTTCTGAG
CTGGTCCCCTTGCGGAGAGTGTAGCAGGGCCATCACCGAGTTCCTGTCCAGATATCCACACGTGACACTGTTTATCTACA
TCGCCAGGCTGTATCACCACGCAGACCCAAGGAATAGGCAGGGCCTGCGCGATCTGATCAGCTCCGGCGTGACCATCCAG
ATCATGACAGAGCAGGAGTCCGGCTACTGCTGGCGGAACTTCGTGAATTATTCTCCTAGCAACGAGGCCCACTGGCCTAG
GTACCCACACCTGTGGGTGCGCCTGTACGTGCTGGAGCTGTATTGCATCATCCTGGGCCTGCCCCCTTGTCTGAATATCC
TGCGGAGAAAGCAGCCCCAGCTGACCTTCTTTACAATCGCCCTGCAGTCTTGTCACTATCAGAGGCTGCCACCCCACATC
CTGTGGGCCACAGGCCTGAAGTCTGGAGGATCTAGCGGAGGCTCCTCTGGCAGCGAGACACCAGGAACAAGCGAGTCAGC
AACACCAGAGAGCAGTGGCGGCAGCAGCGGCGGCAGCAGCGACCTGGTGCTGGGCCTGGCTATCGGCATCGGCAGCGTGG
GCGTGGGCATCCTGAACAAGGTGACCGGCGAGATCATCCACAAGAACAGTCGCATCTTCCCTGCTGCTCAGGCTGAGAAC
AACCTGGTGCGCCGCACCAACCGCCAGGGTCGCCGGCTTGCTCGCCGCAAGAAGCACCGGCGCGTGCGCCTGAACCGCCT
GTTCGAGGAGAGCGGCCTGATCACCGACTTCACCAAGATCAGCATCAACCTGAACCCCTACCAGCTGCGCGTGAAGGGCC
TGACCGACGAGCTGAGCAACGAGGAGCTGTTCATCGCCCTGAAGAACATGGTGAAGCACCGCGGCATCAGCTACCTGGAC
GACGCCAGCGACGACGGCAACAGCAGCGTGGGCGACTACGCCCAGATCGTGAAGGAGAACAGCAAGCAGCTGGAGACCAA
GACCCCCGGCCAGATCCAGCTGGAGCGCTACCAGACCTACGGCCAGCTGCGCGGCGACTTCACCGTGGAGAAGGACGGCA
AGAAGCACCGCCTGATCAACGTGTTCCCCACCAGCGCCTACCGCAGCGAGGCCCTGCGCATCCTGCAGACCCAGCAGGAG
TTCAACCCCCAGATCACCGACGAGTTCATCAACCGCTACCTGGAGATCCTGACCGGCAAGCGCAAGTACTACCACGGCCC
CGGCAACGAGAAGAGCCGCACCGACTACGGCCGCTACCGCACCAGCGGCGAGACCCTGGACAACATCTTCGGCATCCTGA
TCGGCAAGTGCACCTTCTACCCCGACGAGTTCCGCGCCGCCAAGGCCAGCTACACCGCCCAGGAGTTCAATCTGCTGAAC
GACCTGAACAACCTGACCGTGCCCACCGAGACCAAGAAGCTGAGCAAGGAGCAGAAGAACCAGATCATCAACTACGTGAA
GAACGAGAAGGCTATGGGCCCCGCCAAGCTGTTCAAGTACATCGCCAAGCTGCTGAGCTGCGACGTGGCCGACATCAAGG
GCTACCGCATCGACAAGAGCGGCAAGGCCGAGATCCACACCTTCGAGGCCTACCGCAAGATGAAGACCCTGGAGACCCTG
GACATCGAGCAGATGGACCGAGAGACCCTGGACAAGCTGGCCTACGTGCTGACCCTGAACACCGAGCGCGAGGGCATCCA
GGAGGCCCTGGAGCACGAGTTCGCCGACGGCAGCTTCAGCCAGAAACAGGTGGACGAGCTGGTGCAGTTCCGCAAGGCCA
ACAGCAGCATCTTCGGCAAGGGCTGGCACAACTTCAGCGTGAAGCTGATGATGGAGCTGATCCCCGAGCTGTACGAGACC
AGCGAGGAGCAGATGACCATCCTGACCCGCCTGGGCAAGCAGAAGACCACCAGCAGCAGCAACAAGACCAAGTACATCGA
CGAGAAGCTGCTGACCGAGGAGATCTACAACCCCGTGGTGGCCAAGAGCGTGCGCCAGGCCATCAAGATCGTGAACGCCG
CCATCAAGGAGTACGGCGACTTCGACAACATCGTGATCGAGATGGCCCGCGAGACCAACGAGGACGACGAGAAGAAGGCC
ATCCAGAAGATCCAGAAGGCCAACAAGGACGAGAAGGACGCCGCCATGCTGAAGGCCGCCAACCAGTACAACGGCAAGGC
CGAGCTGCCCCACAGCGTGTTCCACGGCCACAAGCAGCTGGCCACCAAGATCCGCCTGTGGCACCAGCAGGGCGAGCGCT
GCCTGTACACCGGCAAGACCATCAGCATCCACGACCTGATCAACAACAGCAACCAGTTCGAGGTGGACCACATCCTGCCC
CTGAGCATCACCTTCGACGACAGCCTGGCCAACAAGGTGCTGGTGTACGCCACCGCCAACCAGGAGAAGGGCCAGCGCAC
CCCCTACCAGGCCCTGGACAGCATGGACGACGCCTGGAGCTTCCGCGAGCTGAAGGCCTTCGTGCGCGAGAGCAAGACCC
TGAGCAACAAGAAGAAGGAGTATCTGCTGACCGAGGAGGACATCAGCAAGTTCGACGTGCGCAAGAAGTTCATCGAGCGC
AACCTGGTGGACACCCGCTACGCCAGCCGCGTGGTGCTGAACGCCCTGCAGGAGCACTTCCGCGCCCACAAGATCGACAC
CAAGGTGAGCGTGGTGCGCGGCCAGTTCACCAGCCAGCTGCGCCGCCACTGGGGCATCGAGAAGACCCGCGACACCTACC
ACCACCACGCCGTGGACGCCCTGATCATTGCGGCTTCTAGCCAGCTGAACCTGTGGAAGAAGCAGAAGAACACCCTGGTG
AGCTACAGCGAGGACCAGCTGCTGGACATCGAGACCGGCGAGCTGATCAGCGACGACGAGTACAAGGAGAGCGTGTTCAA
GGCCCCCTACCAGCACTTCGTGGACACCCTGAAGAGCAAGGAGTTCGAGGACAGCATCCTGTTCAGCTACCAGGTGGACA
GCAAGTTCAACCGCAAGATCAGCGACGCCACCATCTACGCCACCCGCCAGGCCAAGGTGGGCAAGGACAAGGCCGACGAG
ACCTACGTGCTGGGCAAGATCAAGGACATCTACACCCAGGACGGCTACGACGCCTTCATGAAGATCTACAAGAAGGACAA
GAGCAAGTTCCTGATGTACCGCCACGACCCCCAGACCTTCGAGAAGGTGATCGAGCCCATCCTGGAGAACTACCCCAACA
AGCAGATCAACGAGAAAGGCAAGGAGGTGCCCTGCAACCCCTTCCTGAAGTACAAGGAGGAGCACGGCTACATCCGCAAG
TACAGCAAGAAGGGCAACGGCCCCGAGATCAAGAGCCTGAAGTACTACGACAGCAAGCTGGGCAACCACATCGACATCAC
CCCCAAGGACAGCAACAACAAGGTGGTGCTGCAGAGCGTGAGCCCCTGGCGCGCCGACGTGTACTTCAACAAGACCACCG
GCAAGTACGAGATCCTGGGGCTGAAGTACGCCGATCTGCAGTTTGAGAAAGGCACAGGCACCTACAAGATCAGCCAGGAG
AAGTACAACGACATCAAGAAGAAGGAGGGCGTGGACAGCGACAGCGAGTTCAAGTTCACCCTGTACAAGAACGACCTTCT
GCTGGTGAAGGACACCGAGACCAAGGAGCAACAGCTGTTCCGCTTCCTGAGCCGCACCATGCCCAAGCAGAAGCACTACG
TGGAGCTGAAGCCCTACGACAAGCAGAAGTTCGAGGGCGGCGAGGCCCTGATCAAGGTGCTGGGCAACGTGGCCAACAGC
GGCCAGTGCAAGAAGGGCCTGGGCAAGAGCAACATCAGCATCTACAAGGTGCGCACCGACGTGCTGGGCAACCAGCACAT
CATCAAGAACGAGGGCGACAAGCCCAAGTTGGACTTCAGCAGGGCTGACCCCAAGAAGAAGAGGAAGGTGGGATCTAGCG
GCGGGAGCGGCGGGAGCGGGGGGAGCACTAATCTGAGCGACATCATTGAGAAGGAGACTGGGAAACAGCTGGTCATTCAG
GAGTCCATCCTGATGCTGCCTGAGGAGGTGGAGGAAGTGATCGGCAACAAGCCAGAGTCTGACATCCTGGTGCACACCGC
CTACGACGAGTCCACAGATGAGAATGTGATGCTGCTGACCTCTGACGCCCCCGAGTATAAGCCTTGGGCCCTGGTCATCC
AGGATTCTAACGGCGAGAATAAGATCAAGATGCTGAGCGGAGGATCCGGAGGATCTGGAGGCAGCACCAACCTGTCTGAC
ATCATCGAGAAGGAGACAGGCAAGCAGCTGGTCATCCAGGAGAGCATCCTGATGCTGCCCGAAGAAGTCGAAGAAGTGAT
CGGAAACAAGCCTGAGAGCGATATCCTGGTCCATACCGCCTACGACGAGAGTACCGACGAAAATGTGATGCTGCTGACAT
CCGACGCCCCAGAGTATAAGCCCTGGGCTCTGGTCATCCAGGATTCCAACGGAGAGAACAAAATCAAAATGCTGTCTGGC
GGCTCAAAAAGAACCGCCGACGGCAGCGAATTCGAGCCCAAGAAGAAGAGGAAAGTCGGATCCTACCCATACGATGTTCC
AGATTACGCTTATCCCTACGACGTGCCTGATTATGCATACCCATATGATGTCCCCGACTATGCCTAA
MKRTADGSEFESPKKKRKVSSETGPVAVDPTLRRRIEPHEFEVFFDPRELRKETCLLYEINWGGRHSIWRHTSQNTNKHV
EVNFIEKFTTERYFCPNTRCSITWFLSWSPCGECSRAITEFLSRYPHVTLFIYIARLYHHADPRNRQGLRDLISSGVTIQ
IMTEQESGYCWRNFVNYSPSNEAHWPRYPHLWVRLYVLELYCIILGLPPCLNILRRKQPQLTFFTIALQSCHYQRLPPHI
LWATGLKSGGSSGGSSGSETPGTSESATPESSGGSSGGSSDLVLGLAIGIGSVGVGILNKVTGEIIHKNSRIFPAAQAEN
NLVRRTNRQGRRLARRKKHRRVRLNRLFEESGLITDFTKISINLNPYQLRVKGLTDELSNEELFIALKNMVKHRGISYLD
DASDDGNSSVGDYAQIVKENSKQLETKTPGQIQLERYQTYGQLRGDFTVEKDGKKHRLINVFPTSAYRSEALRILQTQQE
FNPQITDEFINRYLEILTGKRKYYHGPGNEKSRTDYGRYRTSGETLDNIFGILIGKCTFYPDEFRAAKASYTAQEFNLLN
DLNNLTVPTETKKLSKEQKNQIINYVKNEKAMGPAKLFKYIAKLLSCDVADIKGYRIDKSGKAEIHTFEAYRKMKTLETL
DIEQMDRETLDKLAYVLTLNTEREGIQEALEHEFADGSFSQKQVDELVQFRKANSSIFGKGWHNFSVKLMMELIPELYET
SEEQMTILTRLGKQKTTSSSNKTKYIDEKLLTEEIYNPVVAKSVRQAIKIVNAAIKEYGDFDNIVIEMARETNEDDEKKA
IQKIQKANKDEKDAAMLKAANQYNGKAELPHSVFHGHKQLATKIRLWHQQGERCLYTGKTISIHDLINNSNQFEVDHILP
LSITFDDSLANKVLVYATANQEKGQRTPYQALDSMDDAWSFRELKAFVRESKTLSNKKKEYLLTEEDISKFDVRKKFIER
NLVDTRYASRVVLNALQEHFRAHKIDTKVSVVRGQFTSQLRRHWGIEKTRDTYHHHAVDALIIAASSQLNLWKKQKNTLV
SYSEDQLLDIETGELISDDEYKESVFKAPYQHFVDTLKSKEFEDSILFSYQVDSKFNRKISDATIYATRQAKVGKDKADE
TYVLGKIKDIYTQDGYDAFMKIYKKDKSKFLMYRHDPQTFEKVIEPILENYPNKQINEKGKEVPCNPFLKYKEEHGYIRK
YSKKGNGPEIKSLKYYDSKLGNHIDITPKDSNNKVVLQSVSPWRADVYFNKTTGKYEILGLKYADLQFEKGTGTYKISQE
KYNDIKKKEGVDSDSEFKFTLYKNDLLLVKDTETKEQQLFRFLSRTMPKQKHYVELKPYDKQKFEGGEALIKVLGNVANS
GQCKKGLGKSNISIYKVRTDVLGNQHIIKNEGDKPKLDFSRADPKKKRKVGSSGGSGGSGGSTNLSDIIEKETGKQLVIQ
ESILMLPEEVEEVIGNKPESDILVHTAYDESTDENVMLLTSDAPEYKPWALVIQDSNGENKIKMLSGGSGGSGGSTNLSD
IIEKETGKQLVIQESILMLPEEVEEVIGNKPESDILVHTAYDESTDENVMLLTSDAPEYKPWALVIQDSNGENKIKMLSG
GSKRTADGSEFEPKKKRKVGSYPYDVPDYAYPYDVPDYAYPYDVPDYA
Supplemental Table S6. DNA and protein sequences for St1BE4max LMD9 ORF. Screenshoots of raw chromatograms for data presented in Fig.3

## Sheet: S7 (St1BE4max LMD9-LMG1831)1
ATGAAACGGACAGCCGACGGAAGCGAGTTCGAGTCACCAAAGAAGAAGCGGAAAGTCTCCTCAGAGACTGGGCCTGTCGC
CGTCGATCCAACCCTGCGCCGCCGGATTGAACCTCACGAGTTTGAAGTGTTCTTTGACCCCCGGGAGCTGAGAAAGGAGA
CATGCCTGCTGTACGAGATCAACTGGGGAGGCAGGCACTCCATCTGGAGGCACACCTCTCAGAACACAAATAAGCACGTG
GAGGTGAACTTCATCGAGAAGTTTACCACAGAGCGGTACTTCTGCCCCAATACCAGATGTAGCATCACATGGTTTCTGAG
CTGGTCCCCTTGCGGAGAGTGTAGCAGGGCCATCACCGAGTTCCTGTCCAGATATCCACACGTGACACTGTTTATCTACA
TCGCCAGGCTGTATCACCACGCAGACCCAAGGAATAGGCAGGGCCTGCGCGATCTGATCAGCTCCGGCGTGACCATCCAG
ATCATGACAGAGCAGGAGTCCGGCTACTGCTGGCGGAACTTCGTGAATTATTCTCCTAGCAACGAGGCCCACTGGCCTAG
GTACCCACACCTGTGGGTGCGCCTGTACGTGCTGGAGCTGTATTGCATCATCCTGGGCCTGCCCCCTTGTCTGAATATCC
TGCGGAGAAAGCAGCCCCAGCTGACCTTCTTTACAATCGCCCTGCAGTCTTGTCACTATCAGAGGCTGCCACCCCACATC
CTGTGGGCCACAGGCCTGAAGTCTGGAGGATCTAGCGGAGGCTCCTCTGGCAGCGAGACACCAGGAACAAGCGAGTCAGC
AACACCAGAGAGCAGTGGCGGCAGCAGCGGCGGCAGCAGCGACCTGGTGCTGGGCCTGGCTATCGGCATCGGCAGCGTGG
GCGTGGGCATCCTGAACAAGGTGACCGGCGAGATCATCCACAAGAACAGTCGCATCTTCCCTGCTGCTCAGGCTGAGAAC
AACCTGGTGCGCCGCACCAACCGCCAGGGTCGCCGGCTTGCTCGCCGCAAGAAGCACCGGCGCGTGCGCCTGAACCGCCT
GTTCGAGGAGAGCGGCCTGATCACCGACTTCACCAAGATCAGCATCAACCTGAACCCCTACCAGCTGCGCGTGAAGGGCC
TGACCGACGAGCTGAGCAACGAGGAGCTGTTCATCGCCCTGAAGAACATGGTGAAGCACCGCGGCATCAGCTACCTGGAC
GACGCCAGCGACGACGGCAACAGCAGCGTGGGCGACTACGCCCAGATCGTGAAGGAGAACAGCAAGCAGCTGGAGACCAA
GACCCCCGGCCAGATCCAGCTGGAGCGCTACCAGACCTACGGCCAGCTGCGCGGCGACTTCACCGTGGAGAAGGACGGCA
AGAAGCACCGCCTGATCAACGTGTTCCCCACCAGCGCCTACCGCAGCGAGGCCCTGCGCATCCTGCAGACCCAGCAGGAG
TTCAACCCCCAGATCACCGACGAGTTCATCAACCGCTACCTGGAGATCCTGACCGGCAAGCGCAAGTACTACCACGGCCC
CGGCAACGAGAAGAGCCGCACCGACTACGGCCGCTACCGCACCAGCGGCGAGACCCTGGACAACATCTTCGGCATCCTGA
TCGGCAAGTGCACCTTCTACCCCGACGAGTTCCGCGCCGCCAAGGCCAGCTACACCGCCCAGGAGTTCAATCTGCTGAAC
GACCTGAACAACCTGACCGTGCCCACCGAGACCAAGAAGCTGAGCAAGGAGCAGAAGAACCAGATCATCAACTACGTGAA
GAACGAGAAGGCTATGGGCCCCGCCAAGCTGTTCAAGTACATCGCCAAGCTGCTGAGCTGCGACGTGGCCGACATCAAGG
GCTACCGCATCGACAAGAGCGGCAAGGCCGAGATCCACACCTTCGAGGCCTACCGCAAGATGAAGACCCTGGAGACCCTG
GACATCGAGCAGATGGACCGAGAGACCCTGGACAAGCTGGCCTACGTGCTGACCCTGAACACCGAGCGCGAGGGCATCCA
GGAGGCCCTGGAGCACGAGTTCGCCGACGGCAGCTTCAGCCAGAAACAGGTGGACGAGCTGGTGCAGTTCCGCAAGGCCA
ACAGCAGCATCTTCGGCAAGGGCTGGCACAACTTCAGCGTGAAGCTGATGATGGAGCTGATCCCCGAGCTGTACGAGACC
AGCGAGGAGCAGATGACCATCCTGACCCGCCTGGGCAAGCAGAAGACCACCAGCAGCAGCAACAAGACCAAGTACATCGA
CGAGAAGCTGCTGACCGAGGAGATCTACAACCCCGTGGTGGCCAAGAGCGTGCGCCAGGCCATCAAGATCGTGAACGCCG
CCATCAAGGAGTACGGCGACTTCGACAACATCGTGATCGAGATGGCCCGCGAGACCAACGAGGACGACGAGAAGAAGGCC
ATCCAGAAGATCCAGAAGGCCAACAAGGACGAGAAGGACGCCGCCATGCTGAAGGCCGCCAACCAGTACAACGGCAAGGC
CGAGCTGCCCCACAGCGTGTTCCACGGCCACAAGCAGCTGGCCACCAAGATCCGCCTGTGGCACCAGCAGGGCGAGCGCT
GCCTGTACACCGGCAAGACCATCAGCATCCACGACCTGATCAACAACAGCAACCAGTTCGAGGTGGACCACATCCTGCCC
CTGAGCATCACCTTCGACGACAGCCTGGCCAACAAGGTGCTGGTGTACGCCACCGCCAACCAGGAGAAGGGCCAGCGCAC
CCCCTACCAGGCCCTGGACAGCATGGACGACGCCTGGAGCTTCCGCGAGCTGAAGGCCTTCGTGCGCGAGAGCAAGACCC
TGAGCAACAAGAAGAAGGAGTATCTGCTGACCGAGGAGGACATCAGCAAGTTCGACGTGCGCAAGAAGTTCATCGAGCGC
AACCTGGTGGACACCCGCTACGCCAGCCGCGTGGTGCTGAACGCCCTGCAGGAGCACTTCCGCGCCCACAAGATCGACAC
CAAGGTGAGCGTGGTGCGCGGCCAGTTCACCAGCCAGCTGCGCCGCCACTGGGGCATCGAGAAGACCCGCGACACCTACC
ACCACCACGCCGTGGACGCCCTGATCATTGCGGCTTCTAGCCAGCTGAACCTGTGGAAGAAGCAGAAGAACACCCTGGTG
AGCTACAGCGAGGACCAGCTGCTGGACATCGAGACCGGCGAGCTGATCAGCGACGACGAGTACAAGGAGAGCGTGTTCAA
GGCCCCCTACCAGCACTTCGTGGACACCCTGAAGAGCAAGGAGTTCGAGGACAGCATCCTGTTCAGCTACCAGGTGGACA
GCAAGTTCAACCGCAAGATCAGCGACGCCACCATCTACGCCACCCGCCAGGCCAAGGTGGGCAAGGACAAGGCCGACGAG
ACCTACGTGCTGGGCAAGATCAAGGACATCTACACCCAGGACGGCTACGACGCCTTCATGAAGATCTACAAGAAGGACAA
GAGCAAGTTCCTGATGTACCGCCACGACCCCCAGACCTTCGAGAAGGTGATCGAGCCCATCCTGGAGAACTACCCCAACA
AGCAGATCAACGAGAAAGGCAAGGAGGTGCCCTGCAACCCCTTCCTGAAGTACAAGGAGGAGCACGGCTACATCCGCAAG
TACAGCAAGAAGGGCAACGGCCCCGAGATCAAGAGCCTGAAGTACTACGACAGCAAGCTGGGCAACCACATCGACATCAC
CCCCAAGGACAGCAACAACAAGGTGGTGCTGCAGAGCGTGAGCCCCTGGCGCGCCGACGTGTACTTCAACAAGAACACCG
GCAAGTACGAGATCCTGGGGCTGAAGTACGCCGATCTGCAGTTTGAGAAAAAGACAGGCACCTACAAGATCAGCCAGGAG
AAGTACAACGGCATCATGAAGGAGGAGGGCGTGGACAGCGACAGCGAGTTCAAGTTCACCCTGTACAAGAACGACCTTCT
GCTGGTGAAGGACACCGAGACCAAGGAGCAACAGCTGTTCCGCTTCCTGAGCCGCACCATGCCCAACGTGAAGTACTACG
TGGAGCTGAAGCCCTACAGCAAGGACAAGTTCGAGAAGAACGAGAGCCTGATCGAGATCCTGGGCAGCGCCGACAAGAGC
GGCAGGTGCATCAAGGGCCTGGGCAAGAGCAACATCAGCATCTACAAGGTGCGCACCGACGTGCTGGGCAACCAGCACAT
CATCAAGAACGAGGGCGACAAGCCCAAGTTGGACTTCAGCAGGGCTGACCCCAAGAAGAAGAGGAAGGTGGGATCTAGCG
GCGGGAGCGGCGGGAGCGGGGGGAGCACTAATCTGAGCGACATCATTGAGAAGGAGACTGGGAAACAGCTGGTCATTCAG
GAGTCCATCCTGATGCTGCCTGAGGAGGTGGAGGAAGTGATCGGCAACAAGCCAGAGTCTGACATCCTGGTGCACACCGC
CTACGACGAGTCCACAGATGAGAATGTGATGCTGCTGACCTCTGACGCCCCCGAGTATAAGCCTTGGGCCCTGGTCATCC
AGGATTCTAACGGCGAGAATAAGATCAAGATGCTGAGCGGAGGATCCGGAGGATCTGGAGGCAGCACCAACCTGTCTGAC
ATCATCGAGAAGGAGACAGGCAAGCAGCTGGTCATCCAGGAGAGCATCCTGATGCTGCCCGAAGAAGTCGAAGAAGTGAT
CGGAAACAAGCCTGAGAGCGATATCCTGGTCCATACCGCCTACGACGAGAGTACCGACGAAAATGTGATGCTGCTGACAT
CCGACGCCCCAGAGTATAAGCCCTGGGCTCTGGTCATCCAGGATTCCAACGGAGAGAACAAAATCAAAATGCTGTCTGGC
GGCTCAAAAAGAACCGCCGACGGCAGCGAATTCGAGCCCAAGAAGAAGAGGAAAGTCGGATCCTACCCATACGATGTTCC
AGATTACGCTTATCCCTACGACGTGCCTGATTATGCATACCCATATGATGTCCCCGACTATGCCTAA
MKRTADGSEFESPKKKRKVSSETGPVAVDPTLRRRIEPHEFEVFFDPRELRKETCLLYEINWGGRHSIWRHTSQNTNKHV
EVNFIEKFTTERYFCPNTRCSITWFLSWSPCGECSRAITEFLSRYPHVTLFIYIARLYHHADPRNRQGLRDLISSGVTIQ
IMTEQESGYCWRNFVNYSPSNEAHWPRYPHLWVRLYVLELYCIILGLPPCLNILRRKQPQLTFFTIALQSCHYQRLPPHI
LWATGLKSGGSSGGSSGSETPGTSESATPESSGGSSGGSSDLVLGLAIGIGSVGVGILNKVTGEIIHKNSRIFPAAQAEN
NLVRRTNRQGRRLARRKKHRRVRLNRLFEESGLITDFTKISINLNPYQLRVKGLTDELSNEELFIALKNMVKHRGISYLD
DASDDGNSSVGDYAQIVKENSKQLETKTPGQIQLERYQTYGQLRGDFTVEKDGKKHRLINVFPTSAYRSEALRILQTQQE
FNPQITDEFINRYLEILTGKRKYYHGPGNEKSRTDYGRYRTSGETLDNIFGILIGKCTFYPDEFRAAKASYTAQEFNLLN
DLNNLTVPTETKKLSKEQKNQIINYVKNEKAMGPAKLFKYIAKLLSCDVADIKGYRIDKSGKAEIHTFEAYRKMKTLETL
DIEQMDRETLDKLAYVLTLNTEREGIQEALEHEFADGSFSQKQVDELVQFRKANSSIFGKGWHNFSVKLMMELIPELYET
SEEQMTILTRLGKQKTTSSSNKTKYIDEKLLTEEIYNPVVAKSVRQAIKIVNAAIKEYGDFDNIVIEMARETNEDDEKKA
IQKIQKANKDEKDAAMLKAANQYNGKAELPHSVFHGHKQLATKIRLWHQQGERCLYTGKTISIHDLINNSNQFEVDHILP
LSITFDDSLANKVLVYATANQEKGQRTPYQALDSMDDAWSFRELKAFVRESKTLSNKKKEYLLTEEDISKFDVRKKFIER
NLVDTRYASRVVLNALQEHFRAHKIDTKVSVVRGQFTSQLRRHWGIEKTRDTYHHHAVDALIIAASSQLNLWKKQKNTLV
SYSEDQLLDIETGELISDDEYKESVFKAPYQHFVDTLKSKEFEDSILFSYQVDSKFNRKISDATIYATRQAKVGKDKADE
TYVLGKIKDIYTQDGYDAFMKIYKKDKSKFLMYRHDPQTFEKVIEPILENYPNKQINEKGKEVPCNPFLKYKEEHGYIRK
YSKKGNGPEIKSLKYYDSKLGNHIDITPKDSNNKVVLQSVSPWRADVYFNKNTGKYEILGLKYADLQFEKKTGTYKISQE
KYNGIMKEEGVDSDSEFKFTLYKNDLLLVKDTETKEQQLFRFLSRTMPNVKYYVELKPYSKDKFEKNESLIEILGSADKS
GRCIKGLGKSNISIYKVRTDVLGNQHIIKNEGDKPKLDFSRADPKKKRKVGSSGGSGGSGGSTNLSDIIEKETGKQLVIQ
ESILMLPEEVEEVIGNKPESDILVHTAYDESTDENVMLLTSDAPEYKPWALVIQDSNGENKIKMLSGGSGGSGGSTNLSD
IIEKETGKQLVIQESILMLPEEVEEVIGNKPESDILVHTAYDESTDENVMLLTSDAPEYKPWALVIQDSNGENKIKMLSG
GSKRTADGSEFEPKKKRKVGSYPYDVPDYAYPYDVPDYAYPYDVPDYA
Supplemental Table S7. DNA and protein sequences for St1BE4max LMD9-LMG18311 chimeric ORF. Screenshoots of raw chromatograms for data presented in Fig.3

## Sheet: S8 (St1BE4max LMD9-CNRZ1066)
ATGAAACGGACAGCCGACGGAAGCGAGTTCGAGTCACCAAAGAAGAAGCGGAAAGTCTCCTCAGAGACTGGGCCTGTCGC
CGTCGATCCAACCCTGCGCCGCCGGATTGAACCTCACGAGTTTGAAGTGTTCTTTGACCCCCGGGAGCTGAGAAAGGAGA
CATGCCTGCTGTACGAGATCAACTGGGGAGGCAGGCACTCCATCTGGAGGCACACCTCTCAGAACACAAATAAGCACGTG
GAGGTGAACTTCATCGAGAAGTTTACCACAGAGCGGTACTTCTGCCCCAATACCAGATGTAGCATCACATGGTTTCTGAG
CTGGTCCCCTTGCGGAGAGTGTAGCAGGGCCATCACCGAGTTCCTGTCCAGATATCCACACGTGACACTGTTTATCTACA
TCGCCAGGCTGTATCACCACGCAGACCCAAGGAATAGGCAGGGCCTGCGCGATCTGATCAGCTCCGGCGTGACCATCCAG
ATCATGACAGAGCAGGAGTCCGGCTACTGCTGGCGGAACTTCGTGAATTATTCTCCTAGCAACGAGGCCCACTGGCCTAG
GTACCCACACCTGTGGGTGCGCCTGTACGTGCTGGAGCTGTATTGCATCATCCTGGGCCTGCCCCCTTGTCTGAATATCC
TGCGGAGAAAGCAGCCCCAGCTGACCTTCTTTACAATCGCCCTGCAGTCTTGTCACTATCAGAGGCTGCCACCCCACATC
CTGTGGGCCACAGGCCTGAAGTCTGGAGGATCTAGCGGAGGCTCCTCTGGCAGCGAGACACCAGGAACAAGCGAGTCAGC
AACACCAGAGAGCAGTGGCGGCAGCAGCGGCGGCAGCAGCGACCTGGTGCTGGGCCTGGCTATCGGCATCGGCAGCGTGG
GCGTGGGCATCCTGAACAAGGTGACCGGCGAGATCATCCACAAGAACAGTCGCATCTTCCCTGCTGCTCAGGCTGAGAAC
AACCTGGTGCGCCGCACCAACCGCCAGGGTCGCCGGCTTGCTCGCCGCAAGAAGCACCGGCGCGTGCGCCTGAACCGCCT
GTTCGAGGAGAGCGGCCTGATCACCGACTTCACCAAGATCAGCATCAACCTGAACCCCTACCAGCTGCGCGTGAAGGGCC
TGACCGACGAGCTGAGCAACGAGGAGCTGTTCATCGCCCTGAAGAACATGGTGAAGCACCGCGGCATCAGCTACCTGGAC
GACGCCAGCGACGACGGCAACAGCAGCGTGGGCGACTACGCCCAGATCGTGAAGGAGAACAGCAAGCAGCTGGAGACCAA
GACCCCCGGCCAGATCCAGCTGGAGCGCTACCAGACCTACGGCCAGCTGCGCGGCGACTTCACCGTGGAGAAGGACGGCA
AGAAGCACCGCCTGATCAACGTGTTCCCCACCAGCGCCTACCGCAGCGAGGCCCTGCGCATCCTGCAGACCCAGCAGGAG
TTCAACCCCCAGATCACCGACGAGTTCATCAACCGCTACCTGGAGATCCTGACCGGCAAGCGCAAGTACTACCACGGCCC
CGGCAACGAGAAGAGCCGCACCGACTACGGCCGCTACCGCACCAGCGGCGAGACCCTGGACAACATCTTCGGCATCCTGA
TCGGCAAGTGCACCTTCTACCCCGACGAGTTCCGCGCCGCCAAGGCCAGCTACACCGCCCAGGAGTTCAATCTGCTGAAC
GACCTGAACAACCTGACCGTGCCCACCGAGACCAAGAAGCTGAGCAAGGAGCAGAAGAACCAGATCATCAACTACGTGAA
GAACGAGAAGGCTATGGGCCCCGCCAAGCTGTTCAAGTACATCGCCAAGCTGCTGAGCTGCGACGTGGCCGACATCAAGG
GCTACCGCATCGACAAGAGCGGCAAGGCCGAGATCCACACCTTCGAGGCCTACCGCAAGATGAAGACCCTGGAGACCCTG
GACATCGAGCAGATGGACCGAGAGACCCTGGACAAGCTGGCCTACGTGCTGACCCTGAACACCGAGCGCGAGGGCATCCA
GGAGGCCCTGGAGCACGAGTTCGCCGACGGCAGCTTCAGCCAGAAACAGGTGGACGAGCTGGTGCAGTTCCGCAAGGCCA
ACAGCAGCATCTTCGGCAAGGGCTGGCACAACTTCAGCGTGAAGCTGATGATGGAGCTGATCCCCGAGCTGTACGAGACC
AGCGAGGAGCAGATGACCATCCTGACCCGCCTGGGCAAGCAGAAGACCACCAGCAGCAGCAACAAGACCAAGTACATCGA
CGAGAAGCTGCTGACCGAGGAGATCTACAACCCCGTGGTGGCCAAGAGCGTGCGCCAGGCCATCAAGATCGTGAACGCCG
CCATCAAGGAGTACGGCGACTTCGACAACATCGTGATCGAGATGGCCCGCGAGACCAACGAGGACGACGAGAAGAAGGCC
ATCCAGAAGATCCAGAAGGCCAACAAGGACGAGAAGGACGCCGCCATGCTGAAGGCCGCCAACCAGTACAACGGCAAGGC
CGAGCTGCCCCACAGCGTGTTCCACGGCCACAAGCAGCTGGCCACCAAGATCCGCCTGTGGCACCAGCAGGGCGAGCGCT
GCCTGTACACCGGCAAGACCATCAGCATCCACGACCTGATCAACAACAGCAACCAGTTCGAGGTGGACCACATCCTGCCC
CTGAGCATCACCTTCGACGACAGCCTGGCCAACAAGGTGCTGGTGTACGCCACCGCCAACCAGGAGAAGGGCCAGCGCAC
CCCCTACCAGGCCCTGGACAGCATGGACGACGCCTGGAGCTTCCGCGAGCTGAAGGCCTTCGTGCGCGAGAGCAAGACCC
TGAGCAACAAGAAGAAGGAGTATCTGCTGACCGAGGAGGACATCAGCAAGTTCGACGTGCGCAAGAAGTTCATCGAGCGC
AACCTGGTGGACACCCGCTACGCCAGCCGCGTGGTGCTGAACGCCCTGCAGGAGCACTTCCGCGCCCACAAGATCGACAC
CAAGGTGAGCGTGGTGCGCGGCCAGTTCACCAGCCAGCTGCGCCGCCACTGGGGCATCGAGAAGACCCGCGACACCTACC
ACCACCACGCCGTGGACGCCCTGATCATTGCGGCTTCTAGCCAGCTGAACCTGTGGAAGAAGCAGAAGAACACCCTGGTG
AGCTACAGCGAGGACCAGCTGCTGGACATCGAGACCGGCGAGCTGATCAGCGACGACGAGTACAAGGAGAGCGTGTTCAA
GGCCCCCTACCAGCACTTCGTGGACACCCTGAAGAGCAAGGAGTTCGAGGACAGCATCCTGTTCAGCTACCAGGTGGACA
GCAAGTTCAACCGCAAGATCAGCGACGCCACCATCTACGCCACCCGCCAGGCCAAGGTGGGCAAGGACAAGGCCGACGAG
ACCTACGTGCTGGGCAAGATCAAGGACATCTACACCCAGGACGGCTACGACGCCTTCATGAAGATCTACAAGAAGGACAA
GAGCAAGTTCCTGATGTACCGCCACGACCCCCAGACCTTCGAGAAGGTGATCGAGCCCATCCTGGAGAACTACCCCAACA
AGCAGATCAACGAGAAAGGCAAGGAGGTGCCCTGCAACCCCTTCCTGAAGTACAAGGAGGAGCACGGCTACATCCGCAAG
TACAGCAAGAAGGGCAACGGCCCCGAGATCAAGAGCCTGAAGTACTACGACAGCAAGCTGGGCAACCACATCGACATCAC
CCCCAAGGACAGCAACAACAAGGTGGTGCTGCAGAGCGTGAGCCCCTGGCGCGCCGACGTGTACTTCAACAAGGCCACCG
GCAAGTACGAGATCCTGGGGCTGAAGTACGCCGATCTGCAGTTTGAGAAAGGCACAGGCACCTACAAGATCAGCCAGGAG
AAGTACAACGACATCAAGAAGAAGGAGGGCGTGGACAGCGACAGCGAGTTCAAGTTCACCCTGTACAAGAACGACCTTCT
GCTGGTGAAGGACACCGAGACCAAGGAGCAACAGCTGTTCCGCTTCCTGAGCCGCACCCTGCCCAAGCAGAAGCACTACG
TGGAGCTGAAGCCCTACGACAAGCAGAAGTTCGAGGGCGGCGAGGCCCTGATCAAGGTGCTGGGCAACGTGGCCAACGGC
GGCCAGTGCATCAAGGGCCTGGCCAAGAGCAACATCAGCATCTACAAGGTGCGCACCGACGTGCTGGGCAACCAGCACAT
CATCAAGAACGAGGGCGACAAGCCCAAGTTGGACTTCAGCAGGGCTGACCCCAAGAAGAAGAGGAAGGTGGGATCTAGCG
GCGGGAGCGGCGGGAGCGGGGGGAGCACTAATCTGAGCGACATCATTGAGAAGGAGACTGGGAAACAGCTGGTCATTCAG
GAGTCCATCCTGATGCTGCCTGAGGAGGTGGAGGAAGTGATCGGCAACAAGCCAGAGTCTGACATCCTGGTGCACACCGC
CTACGACGAGTCCACAGATGAGAATGTGATGCTGCTGACCTCTGACGCCCCCGAGTATAAGCCTTGGGCCCTGGTCATCC
AGGATTCTAACGGCGAGAATAAGATCAAGATGCTGAGCGGAGGATCCGGAGGATCTGGAGGCAGCACCAACCTGTCTGAC
ATCATCGAGAAGGAGACAGGCAAGCAGCTGGTCATCCAGGAGAGCATCCTGATGCTGCCCGAAGAAGTCGAAGAAGTGAT
CGGAAACAAGCCTGAGAGCGATATCCTGGTCCATACCGCCTACGACGAGAGTACCGACGAAAATGTGATGCTGCTGACAT
CCGACGCCCCAGAGTATAAGCCCTGGGCTCTGGTCATCCAGGATTCCAACGGAGAGAACAAAATCAAAATGCTGTCTGGC
GGCTCAAAAAGAACCGCCGACGGCAGCGAATTCGAGCCCAAGAAGAAGAGGAAAGTCGGATCCTACCCATACGATGTTCC
AGATTACGCTTATCCCTACGACGTGCCTGATTATGCATACCCATATGATGTCCCCGACTATGCCTAA
MKRTADGSEFESPKKKRKVSSETGPVAVDPTLRRRIEPHEFEVFFDPRELRKETCLLYEINWGGRHSIWRHTSQNTNKHV
EVNFIEKFTTERYFCPNTRCSITWFLSWSPCGECSRAITEFLSRYPHVTLFIYIARLYHHADPRNRQGLRDLISSGVTIQ
IMTEQESGYCWRNFVNYSPSNEAHWPRYPHLWVRLYVLELYCIILGLPPCLNILRRKQPQLTFFTIALQSCHYQRLPPHI
LWATGLKSGGSSGGSSGSETPGTSESATPESSGGSSGGSSDLVLGLAIGIGSVGVGILNKVTGEIIHKNSRIFPAAQAEN
NLVRRTNRQGRRLARRKKHRRVRLNRLFEESGLITDFTKISINLNPYQLRVKGLTDELSNEELFIALKNMVKHRGISYLD
DASDDGNSSVGDYAQIVKENSKQLETKTPGQIQLERYQTYGQLRGDFTVEKDGKKHRLINVFPTSAYRSEALRILQTQQE
FNPQITDEFINRYLEILTGKRKYYHGPGNEKSRTDYGRYRTSGETLDNIFGILIGKCTFYPDEFRAAKASYTAQEFNLLN
DLNNLTVPTETKKLSKEQKNQIINYVKNEKAMGPAKLFKYIAKLLSCDVADIKGYRIDKSGKAEIHTFEAYRKMKTLETL
DIEQMDRETLDKLAYVLTLNTEREGIQEALEHEFADGSFSQKQVDELVQFRKANSSIFGKGWHNFSVKLMMELIPELYET
SEEQMTILTRLGKQKTTSSSNKTKYIDEKLLTEEIYNPVVAKSVRQAIKIVNAAIKEYGDFDNIVIEMARETNEDDEKKA
IQKIQKANKDEKDAAMLKAANQYNGKAELPHSVFHGHKQLATKIRLWHQQGERCLYTGKTISIHDLINNSNQFEVDHILP
LSITFDDSLANKVLVYATANQEKGQRTPYQALDSMDDAWSFRELKAFVRESKTLSNKKKEYLLTEEDISKFDVRKKFIER
NLVDTRYASRVVLNALQEHFRAHKIDTKVSVVRGQFTSQLRRHWGIEKTRDTYHHHAVDALIIAASSQLNLWKKQKNTLV
SYSEDQLLDIETGELISDDEYKESVFKAPYQHFVDTLKSKEFEDSILFSYQVDSKFNRKISDATIYATRQAKVGKDKADE
TYVLGKIKDIYTQDGYDAFMKIYKKDKSKFLMYRHDPQTFEKVIEPILENYPNKQINEKGKEVPCNPFLKYKEEHGYIRK
YSKKGNGPEIKSLKYYDSKLGNHIDITPKDSNNKVVLQSVSPWRADVYFNKATGKYEILGLKYADLQFEKGTGTYKISQE
KYNDIKKKEGVDSDSEFKFTLYKNDLLLVKDTETKEQQLFRFLSRTLPKQKHYVELKPYDKQKFEGGEALIKVLGNVANG
GQCIKGLAKSNISIYKVRTDVLGNQHIIKNEGDKPKLDFSRADPKKKRKVGSSGGSGGSGGSTNLSDIIEKETGKQLVIQ
ESILMLPEEVEEVIGNKPESDILVHTAYDESTDENVMLLTSDAPEYKPWALVIQDSNGENKIKMLSGGSGGSGGSTNLSD
IIEKETGKQLVIQESILMLPEEVEEVIGNKPESDILVHTAYDESTDENVMLLTSDAPEYKPWALVIQDSNGENKIKMLSG
GSKRTADGSEFEPKKKRKVGSYPYDVPDYAYPYDVPDYAYPYDVPDYA
Supplemental Table S8. DNA and protein sequences for St1BE4max LMD9-CNRZ1066 chimeric ORF. Screenshoots of raw chromatograms for data presented in Fig.3

## Sheet: S9 (St1BE4max LMD9-TH1477)
ATGAAACGGACAGCCGACGGAAGCGAGTTCGAGTCACCAAAGAAGAAGCGGAAAGTCTCCTCAGAGACTGGGCCTGTCGC
CGTCGATCCAACCCTGCGCCGCCGGATTGAACCTCACGAGTTTGAAGTGTTCTTTGACCCCCGGGAGCTGAGAAAGGAGA
CATGCCTGCTGTACGAGATCAACTGGGGAGGCAGGCACTCCATCTGGAGGCACACCTCTCAGAACACAAATAAGCACGTG
GAGGTGAACTTCATCGAGAAGTTTACCACAGAGCGGTACTTCTGCCCCAATACCAGATGTAGCATCACATGGTTTCTGAG
CTGGTCCCCTTGCGGAGAGTGTAGCAGGGCCATCACCGAGTTCCTGTCCAGATATCCACACGTGACACTGTTTATCTACA
TCGCCAGGCTGTATCACCACGCAGACCCAAGGAATAGGCAGGGCCTGCGCGATCTGATCAGCTCCGGCGTGACCATCCAG
ATCATGACAGAGCAGGAGTCCGGCTACTGCTGGCGGAACTTCGTGAATTATTCTCCTAGCAACGAGGCCCACTGGCCTAG
GTACCCACACCTGTGGGTGCGCCTGTACGTGCTGGAGCTGTATTGCATCATCCTGGGCCTGCCCCCTTGTCTGAATATCC
TGCGGAGAAAGCAGCCCCAGCTGACCTTCTTTACAATCGCCCTGCAGTCTTGTCACTATCAGAGGCTGCCACCCCACATC
CTGTGGGCCACAGGCCTGAAGTCTGGAGGATCTAGCGGAGGCTCCTCTGGCAGCGAGACACCAGGAACAAGCGAGTCAGC
AACACCAGAGAGCAGTGGCGGCAGCAGCGGCGGCAGCAGCGACCTGGTGCTGGGCCTGGCTATCGGCATCGGCAGCGTGG
GCGTGGGCATCCTGAACAAGGTGACCGGCGAGATCATCCACAAGAACAGTCGCATCTTCCCTGCTGCTCAGGCTGAGAAC
AACCTGGTGCGCCGCACCAACCGCCAGGGTCGCCGGCTTGCTCGCCGCAAGAAGCACCGGCGCGTGCGCCTGAACCGCCT
GTTCGAGGAGAGCGGCCTGATCACCGACTTCACCAAGATCAGCATCAACCTGAACCCCTACCAGCTGCGCGTGAAGGGCC
TGACCGACGAGCTGAGCAACGAGGAGCTGTTCATCGCCCTGAAGAACATGGTGAAGCACCGCGGCATCAGCTACCTGGAC
GACGCCAGCGACGACGGCAACAGCAGCGTGGGCGACTACGCCCAGATCGTGAAGGAGAACAGCAAGCAGCTGGAGACCAA
GACCCCCGGCCAGATCCAGCTGGAGCGCTACCAGACCTACGGCCAGCTGCGCGGCGACTTCACCGTGGAGAAGGACGGCA
AGAAGCACCGCCTGATCAACGTGTTCCCCACCAGCGCCTACCGCAGCGAGGCCCTGCGCATCCTGCAGACCCAGCAGGAG
TTCAACCCCCAGATCACCGACGAGTTCATCAACCGCTACCTGGAGATCCTGACCGGCAAGCGCAAGTACTACCACGGCCC
CGGCAACGAGAAGAGCCGCACCGACTACGGCCGCTACCGCACCAGCGGCGAGACCCTGGACAACATCTTCGGCATCCTGA
TCGGCAAGTGCACCTTCTACCCCGACGAGTTCCGCGCCGCCAAGGCCAGCTACACCGCCCAGGAGTTCAATCTGCTGAAC
GACCTGAACAACCTGACCGTGCCCACCGAGACCAAGAAGCTGAGCAAGGAGCAGAAGAACCAGATCATCAACTACGTGAA
GAACGAGAAGGCTATGGGCCCCGCCAAGCTGTTCAAGTACATCGCCAAGCTGCTGAGCTGCGACGTGGCCGACATCAAGG
GCTACCGCATCGACAAGAGCGGCAAGGCCGAGATCCACACCTTCGAGGCCTACCGCAAGATGAAGACCCTGGAGACCCTG
GACATCGAGCAGATGGACCGAGAGACCCTGGACAAGCTGGCCTACGTGCTGACCCTGAACACCGAGCGCGAGGGCATCCA
GGAGGCCCTGGAGCACGAGTTCGCCGACGGCAGCTTCAGCCAGAAACAGGTGGACGAGCTGGTGCAGTTCCGCAAGGCCA
ACAGCAGCATCTTCGGCAAGGGCTGGCACAACTTCAGCGTGAAGCTGATGATGGAGCTGATCCCCGAGCTGTACGAGACC
AGCGAGGAGCAGATGACCATCCTGACCCGCCTGGGCAAGCAGAAGACCACCAGCAGCAGCAACAAGACCAAGTACATCGA
CGAGAAGCTGCTGACCGAGGAGATCTACAACCCCGTGGTGGCCAAGAGCGTGCGCCAGGCCATCAAGATCGTGAACGCCG
CCATCAAGGAGTACGGCGACTTCGACAACATCGTGATCGAGATGGCCCGCGAGACCAACGAGGACGACGAGAAGAAGGCC
ATCCAGAAGATCCAGAAGGCCAACAAGGACGAGAAGGACGCCGCCATGCTGAAGGCCGCCAACCAGTACAACGGCAAGGC
CGAGCTGCCCCACAGCGTGTTCCACGGCCACAAGCAGCTGGCCACCAAGATCCGCCTGTGGCACCAGCAGGGCGAGCGCT
GCCTGTACACCGGCAAGACCATCAGCATCCACGACCTGATCAACAACAGCAACCAGTTCGAGGTGGACCACATCCTGCCC
CTGAGCATCACCTTCGACGACAGCCTGGCCAACAAGGTGCTGGTGTACGCCACCGCCAACCAGGAGAAGGGCCAGCGCAC
CCCCTACCAGGCCCTGGACAGCATGGACGACGCCTGGAGCTTCCGCGAGCTGAAGGCCTTCGTGCGCGAGAGCAAGACCC
TGAGCAACAAGAAGAAGGAGTATCTGCTGACCGAGGAGGACATCAGCAAGTTCGACGTGCGCAAGAAGTTCATCGAGCGC
AACCTGGTGGACACCCGCTACGCCAGCCGCGTGGTGCTGAACGCCCTGCAGGAGCACTTCCGCGCCCACAAGATCGACAC
CAAGGTGAGCGTGGTGCGCGGCCAGTTCACCAGCCAGCTGCGCCGCCACTGGGGCATCGAGAAGACCCGCGACACCTACC
ACCACCACGCCGTGGACGCCCTGATCATTGCGGCTTCTAGCCAGCTGAACCTGTGGAAGAAGCAGAAGAACACCCTGGTG
AGCTACAGCGAGGACCAGCTGCTGGACATCGAGACCGGCGAGCTGATCAGCGACGACGAGTACAAGGAGAGCGTGTTCAA
GGCCCCCTACCAGCACTTCGTGGACACCCTGAAGAGCAAGGAGTTCGAGGACAGCATCCTGTTCAGCTACCAGGTGGACA
GCAAGTTCAACCGCAAGATCAGCGACGCCACCATCTACGCCACCCGCCAGGCCAAGGTGGGCAAGGACAAGGCCGACGAG
ACCTACGTGCTGGGCAAGATCAAGGACATCTACACCCAGGACGGCTACGACGCCTTCATGAAGATCTACAAGAAGGACAA
GAGCAAGTTCCTGATGTACCGCCACGACCCCCAGACCTTCGAGAAGGTGATCGAGCCCATCCTGGAGAACTACCCCAACA
AGCAGATCAACGAGAAAGGCAAGGAGGTGCCCTGCAACCCCTTCCTGAAGTACAAGGAGGAGCACGGCTACATCCGCAAG
TACAGCAAGAAGGGCAACGGCCCCGAGATCAAGAGCCTGAAGTACTACGACAGCAAGCTGGGCAACCACATCGACATCAC
CCCCAAGGACAGCAACAACAAGGTGGTGCTGCAGAGCGTGAGCCCCTGGCGCGCCGACGTGTACTTCAACAAGAACACCG
GCAAGTACGAGATCCTGGGGCTGAAGTACAGCGATATGCAGTTTGAGAAAGGCACAGGCAAGTACAGCATCAGCAAGGAG
CAGTACGAGAACATCAAGGTGCGCGAGGGCGTGGACGAGAACAGCGAGTTCAAGTTCACCCTGTACAAGAACGACCTTCT
GCTGCTGAAGGACAGCGAGAACGGCGAGCAAATCCTGCTGCGCTTCACCAGCCGCAACGACACCAGCAAGCACTACGTGG
AGCTGAAGCCCTACAACCGCCAGAAGTTCGAGGGCAGCGAGTACCTGATCAAGAGCCTGGGCACCGTGGTGAAGGGCGGC
AGGTGCATCAAGGGCCTGGGCAAGAGCAACATCAGCATCTACAAGGTGCGCACCGACGTGCTGGGCAACCAGCACATCAT
CAAGAACGAGGGCGACAAGCCCAAGTTGGACTTCAGCAGGGCTGACCCCAAGAAGAAGAGGAAGGTGGGATCTAGCGGCG
GGAGCGGCGGGAGCGGGGGGAGCACTAATCTGAGCGACATCATTGAGAAGGAGACTGGGAAACAGCTGGTCATTCAGGAG
TCCATCCTGATGCTGCCTGAGGAGGTGGAGGAAGTGATCGGCAACAAGCCAGAGTCTGACATCCTGGTGCACACCGCCTA
CGACGAGTCCACAGATGAGAATGTGATGCTGCTGACCTCTGACGCCCCCGAGTATAAGCCTTGGGCCCTGGTCATCCAGG
ATTCTAACGGCGAGAATAAGATCAAGATGCTGAGCGGAGGATCCGGAGGATCTGGAGGCAGCACCAACCTGTCTGACATC
ATCGAGAAGGAGACAGGCAAGCAGCTGGTCATCCAGGAGAGCATCCTGATGCTGCCCGAAGAAGTCGAAGAAGTGATCGG
AAACAAGCCTGAGAGCGATATCCTGGTCCATACCGCCTACGACGAGAGTACCGACGAAAATGTGATGCTGCTGACATCCG
ACGCCCCAGAGTATAAGCCCTGGGCTCTGGTCATCCAGGATTCCAACGGAGAGAACAAAATCAAAATGCTGTCTGGCGGC
TCAAAAAGAACCGCCGACGGCAGCGAATTCGAGCCCAAGAAGAAGAGGAAAGTCGGATCCTACCCATACGATGTTCCAGA
TTACGCTTATCCCTACGACGTGCCTGATTATGCATACCCATATGATGTCCCCGACTATGCCTAA
MKRTADGSEFESPKKKRKVSSETGPVAVDPTLRRRIEPHEFEVFFDPRELRKETCLLYEINWGGRHSIWRHTSQNTNKHV
EVNFIEKFTTERYFCPNTRCSITWFLSWSPCGECSRAITEFLSRYPHVTLFIYIARLYHHADPRNRQGLRDLISSGVTIQ
IMTEQESGYCWRNFVNYSPSNEAHWPRYPHLWVRLYVLELYCIILGLPPCLNILRRKQPQLTFFTIALQSCHYQRLPPHI
LWATGLKSGGSSGGSSGSETPGTSESATPESSGGSSGGSSDLVLGLAIGIGSVGVGILNKVTGEIIHKNSRIFPAAQAEN
NLVRRTNRQGRRLARRKKHRRVRLNRLFEESGLITDFTKISINLNPYQLRVKGLTDELSNEELFIALKNMVKHRGISYLD
DASDDGNSSVGDYAQIVKENSKQLETKTPGQIQLERYQTYGQLRGDFTVEKDGKKHRLINVFPTSAYRSEALRILQTQQE
FNPQITDEFINRYLEILTGKRKYYHGPGNEKSRTDYGRYRTSGETLDNIFGILIGKCTFYPDEFRAAKASYTAQEFNLLN
DLNNLTVPTETKKLSKEQKNQIINYVKNEKAMGPAKLFKYIAKLLSCDVADIKGYRIDKSGKAEIHTFEAYRKMKTLETL
DIEQMDRETLDKLAYVLTLNTEREGIQEALEHEFADGSFSQKQVDELVQFRKANSSIFGKGWHNFSVKLMMELIPELYET
SEEQMTILTRLGKQKTTSSSNKTKYIDEKLLTEEIYNPVVAKSVRQAIKIVNAAIKEYGDFDNIVIEMARETNEDDEKKA
IQKIQKANKDEKDAAMLKAANQYNGKAELPHSVFHGHKQLATKIRLWHQQGERCLYTGKTISIHDLINNSNQFEVDHILP
LSITFDDSLANKVLVYATANQEKGQRTPYQALDSMDDAWSFRELKAFVRESKTLSNKKKEYLLTEEDISKFDVRKKFIER
NLVDTRYASRVVLNALQEHFRAHKIDTKVSVVRGQFTSQLRRHWGIEKTRDTYHHHAVDALIIAASSQLNLWKKQKNTLV
SYSEDQLLDIETGELISDDEYKESVFKAPYQHFVDTLKSKEFEDSILFSYQVDSKFNRKISDATIYATRQAKVGKDKADE
TYVLGKIKDIYTQDGYDAFMKIYKKDKSKFLMYRHDPQTFEKVIEPILENYPNKQINEKGKEVPCNPFLKYKEEHGYIRK
YSKKGNGPEIKSLKYYDSKLGNHIDITPKDSNNKVVLQSVSPWRADVYFNKNTGKYEILGLKYSDMQFEKGTGKYSISKE
QYENIKVREGVDENSEFKFTLYKNDLLLLKDSENGEQILLRFTSRNDTSKHYVELKPYNRQKFEGSEYLIKSLGTVVKGG
RCIKGLGKSNISIYKVRTDVLGNQHIIKNEGDKPKLDFSRADPKKKRKVGSSGGSGGSGGSTNLSDIIEKETGKQLVIQE
SILMLPEEVEEVIGNKPESDILVHTAYDESTDENVMLLTSDAPEYKPWALVIQDSNGENKIKMLSGGSGGSGGSTNLSDI
IEKETGKQLVIQESILMLPEEVEEVIGNKPESDILVHTAYDESTDENVMLLTSDAPEYKPWALVIQDSNGENKIKMLSGG
SKRTADGSEFEPKKKRKVGSYPYDVPDYAYPYDVPDYAYPYDVPDYA
Supplemental Table S9. DNA and protein sequences for St1BE4max LMD9-TH1477 chimeric ORF. Screenshoots of raw chromatograms for data presented in Fig.3

## Sheet: S10 (St1Abemax LMD9)
ATGAAACGGACAGCCGACGGAAGCGAGTTCGAGTCACCAAAGAAGAAGCGGAAAGTCTCTGAAGTCGAGTTTAGCCACGA
GTATTGGATGAGGCACGCACTGACCCTGGCAAAGCGAGCATGGGATGAAAGAGAAGTCCCCGTGGGCGCCGTGCTGGTGC
ACAACAATAGAGTGATCGGAGAGGGATGGAACAGGCCAATCGGCCGCCACGACCCTACCGCACACGCAGAGATCATGGCA
CTGAGGCAGGGAGGCCTGGTCATGCAGAATTACCGCCTGATCGATGCCACCCTGTATGTGACACTGGAGCCATGCGTGAT
GTGCGCAGGAGCAATGATCCACAGCAGGATCGGAAGAGTGGTGTTCGGAGCACGGGACGCCAAGACCGGCGCAGCAGGCT
CCCTGATGGATGTGCTGCACCACCCCGGCATGAACCACCGGGTGGAGATCACAGAGGGAATCCTGGCAGACGAGTGCGCC
GCCCTGCTGAGCGATTTCTTTAGAATGCGGAGACAGGAGATCAAGGCCCAGAAGAAGGCACAGAGCTCCACCGACTCTGG
AGGATCTAGCGGAGGATCCTCTGGAAGCGAGACACCAGGCACAAGCGAGTCCGCCACACCAGAGAGCTCCGGCGGCTCCT
CCGGAGGATCCTCTGAGGTGGAGTTTTCCCACGAGTACTGGATGAGACATGCCCTGACCCTGGCCAAGAGGGCACGCGAT
GAGAGGGAGGTGCCTGTGGGAGCCGTGCTGGTGCTGAACAATAGAGTGATCGGCGAGGGCTGGAACAGAGCCATCGGCCT
GCACGACCCAACAGCCCATGCCGAAATTATGGCCCTGAGACAGGGCGGCCTGGTCATGCAGAACTACAGACTGATTGACG
CCACCCTGTACGTGACATTCGAGCCTTGCGTGATGTGCGCCGGCGCCATGATCCACTCTAGGATCGGCCGCGTGGTGTTT
GGCGTGAGGAACGCAAAAACCGGCGCCGCAGGCTCCCTGATGGACGTGCTGCACTACCCCGGCATGAATCACCGCGTCGA
AATTACCGAGGGAATCCTGGCAGATGAATGTGCCGCCCTGCTGTGCTATTTCTTTCGGATGCCTAGACAGGTGTTCAATG
CTCAGAAGAAGGCCCAGAGCTCCACCGACTCCGGAGGATCTAGCGGAGGCTCCTCTGGCTCTGAGACACCTGGCACAAGC
GAGAGCGCAACACCTGAAAGCAGCGGGGGCAGCAGCGGGGGGTCAAGCGACCTGGTGCTGGGCCTGGCTATCGGCATCGG
CAGCGTGGGCGTGGGCATCCTGAACAAGGTGACCGGCGAGATCATCCACAAGAACAGTCGCATCTTCCCTGCTGCTCAGG
CTGAGAACAACCTGGTGCGCCGCACCAACCGCCAGGGTCGCCGGCTTGCTCGCCGCAAGAAGCACCGGCGCGTGCGCCTG
AACCGCCTGTTCGAGGAGAGCGGCCTGATCACCGACTTCACCAAGATCAGCATCAACCTGAACCCCTACCAGCTGCGCGT
GAAGGGCCTGACCGACGAGCTGAGCAACGAGGAGCTGTTCATCGCCCTGAAGAACATGGTGAAGCACCGCGGCATCAGCT
ACCTGGACGACGCCAGCGACGACGGCAACAGCAGCGTGGGCGACTACGCCCAGATCGTGAAGGAGAACAGCAAGCAGCTG
GAGACCAAGACCCCCGGCCAGATCCAGCTGGAGCGCTACCAGACCTACGGCCAGCTGCGCGGCGACTTCACCGTGGAGAA
GGACGGCAAGAAGCACCGCCTGATCAACGTGTTCCCCACCAGCGCCTACCGCAGCGAGGCCCTGCGCATCCTGCAGACCC
AGCAGGAGTTCAACCCCCAGATCACCGACGAGTTCATCAACCGCTACCTGGAGATCCTGACCGGCAAGCGCAAGTACTAC
CACGGCCCCGGCAACGAGAAGAGCCGCACCGACTACGGCCGCTACCGCACCAGCGGCGAGACCCTGGACAACATCTTCGG
CATCCTGATCGGCAAGTGCACCTTCTACCCCGACGAGTTCCGCGCCGCCAAGGCCAGCTACACCGCCCAGGAGTTCAATC
TGCTGAACGACCTGAACAACCTGACCGTGCCCACCGAGACCAAGAAGCTGAGCAAGGAGCAGAAGAACCAGATCATCAAC
TACGTGAAGAACGAGAAGGCTATGGGCCCCGCCAAGCTGTTCAAGTACATCGCCAAGCTGCTGAGCTGCGACGTGGCCGA
CATCAAGGGCTACCGCATCGACAAGAGCGGCAAGGCCGAGATCCACACCTTCGAGGCCTACCGCAAGATGAAGACCCTGG
AGACCCTGGACATCGAGCAGATGGACCGAGAGACCCTGGACAAGCTGGCCTACGTGCTGACCCTGAACACCGAGCGCGAG
GGCATCCAGGAGGCCCTGGAGCACGAGTTCGCCGACGGCAGCTTCAGCCAGAAACAGGTGGACGAGCTGGTGCAGTTCCG
CAAGGCCAACAGCAGCATCTTCGGCAAGGGCTGGCACAACTTCAGCGTGAAGCTGATGATGGAGCTGATCCCCGAGCTGT
ACGAGACCAGCGAGGAGCAGATGACCATCCTGACCCGCCTGGGCAAGCAGAAGACCACCAGCAGCAGCAACAAGACCAAG
TACATCGACGAGAAGCTGCTGACCGAGGAGATCTACAACCCCGTGGTGGCCAAGAGCGTGCGCCAGGCCATCAAGATCGT
GAACGCCGCCATCAAGGAGTACGGCGACTTCGACAACATCGTGATCGAGATGGCCCGCGAGACCAACGAGGACGACGAGA
AGAAGGCCATCCAGAAGATCCAGAAGGCCAACAAGGACGAGAAGGACGCCGCCATGCTGAAGGCCGCCAACCAGTACAAC
GGCAAGGCCGAGCTGCCCCACAGCGTGTTCCACGGCCACAAGCAGCTGGCCACCAAGATCCGCCTGTGGCACCAGCAGGG
CGAGCGCTGCCTGTACACCGGCAAGACCATCAGCATCCACGACCTGATCAACAACAGCAACCAGTTCGAGGTGGACCACA
TCCTGCCCCTGAGCATCACCTTCGACGACAGCCTGGCCAACAAGGTGCTGGTGTACGCCACCGCCAACCAGGAGAAGGGC
CAGCGCACCCCCTACCAGGCCCTGGACAGCATGGACGACGCCTGGAGCTTCCGCGAGCTGAAGGCCTTCGTGCGCGAGAG
CAAGACCCTGAGCAACAAGAAGAAGGAGTATCTGCTGACCGAGGAGGACATCAGCAAGTTCGACGTGCGCAAGAAGTTCA
TCGAGCGCAACCTGGTGGACACCCGCTACGCCAGCCGCGTGGTGCTGAACGCCCTGCAGGAGCACTTCCGCGCCCACAAG
ATCGACACCAAGGTGAGCGTGGTGCGCGGCCAGTTCACCAGCCAGCTGCGCCGCCACTGGGGCATCGAGAAGACCCGCGA
CACCTACCACCACCACGCCGTGGACGCCCTGATCATTGCGGCTTCTAGCCAGCTGAACCTGTGGAAGAAGCAGAAGAACA
CCCTGGTGAGCTACAGCGAGGACCAGCTGCTGGACATCGAGACCGGCGAGCTGATCAGCGACGACGAGTACAAGGAGAGC
GTGTTCAAGGCCCCCTACCAGCACTTCGTGGACACCCTGAAGAGCAAGGAGTTCGAGGACAGCATCCTGTTCAGCTACCA
GGTGGACAGCAAGTTCAACCGCAAGATCAGCGACGCCACCATCTACGCCACCCGCCAGGCCAAGGTGGGCAAGGACAAGG
CCGACGAGACCTACGTGCTGGGCAAGATCAAGGACATCTACACCCAGGACGGCTACGACGCCTTCATGAAGATCTACAAG
AAGGACAAGAGCAAGTTCCTGATGTACCGCCACGACCCCCAGACCTTCGAGAAGGTGATCGAGCCCATCCTGGAGAACTA
CCCCAACAAGCAGATCAACGAGAAAGGCAAGGAGGTGCCCTGCAACCCCTTCCTGAAGTACAAGGAGGAGCACGGCTACA
TCCGCAAGTACAGCAAGAAGGGCAACGGCCCCGAGATCAAGAGCCTGAAGTACTACGACAGCAAGCTGGGCAACCACATC
GACATCACCCCCAAGGACAGCAACAACAAGGTGGTGCTGCAGAGCGTGAGCCCCTGGCGCGCCGACGTGTACTTCAACAA
GACCACCGGCAAGTACGAGATCCTGGGGCTGAAGTACGCCGATCTGCAGTTTGAGAAAGGCACAGGCACCTACAAGATCA
GCCAGGAGAAGTACAACGACATCAAGAAGAAGGAGGGCGTGGACAGCGACAGCGAGTTCAAGTTCACCCTGTACAAGAAC
GACCTTCTGCTGGTGAAGGACACCGAGACCAAGGAGCAACAGCTGTTCCGCTTCCTGAGCCGCACCATGCCCAAGCAGAA
GCACTACGTGGAGCTGAAGCCCTACGACAAGCAGAAGTTCGAGGGCGGCGAGGCCCTGATCAAGGTGCTGGGCAACGTGG
CCAACAGCGGCCAGTGCAAGAAGGGCCTGGGCAAGAGCAACATCAGCATCTACAAGGTGCGCACCGACGTGCTGGGCAAC
CAGCACATCATCAAGAACGAGGGCGACAAGCCCAAGTTGGACTTCAGCAGGGCTGACCCCAAGAAGAAGAGGAAGGTGTG
A
MKRTADGSEFESPKKKRKVSEVEFSHEYWMRHALTLAKRAWDEREVPVGAVLVHNNRVIGEGWNRPIGRHDPTAHAEIMA
LRQGGLVMQNYRLIDATLYVTLEPCVMCAGAMIHSRIGRVVFGARDAKTGAAGSLMDVLHHPGMNHRVEITEGILADECA
ALLSDFFRMRRQEIKAQKKAQSSTDSGGSSGGSSGSETPGTSESATPESSGGSSGGSSEVEFSHEYWMRHALTLAKRARD
EREVPVGAVLVLNNRVIGEGWNRAIGLHDPTAHAEIMALRQGGLVMQNYRLIDATLYVTFEPCVMCAGAMIHSRIGRVVF
GVRNAKTGAAGSLMDVLHYPGMNHRVEITEGILADECAALLCYFFRMPRQVFNAQKKAQSSTDSGGSSGGSSGSETPGTS
ESATPESSGGSSGGSSDLVLGLAIGIGSVGVGILNKVTGEIIHKNSRIFPAAQAENNLVRRTNRQGRRLARRKKHRRVRL
NRLFEESGLITDFTKISINLNPYQLRVKGLTDELSNEELFIALKNMVKHRGISYLDDASDDGNSSVGDYAQIVKENSKQL
ETKTPGQIQLERYQTYGQLRGDFTVEKDGKKHRLINVFPTSAYRSEALRILQTQQEFNPQITDEFINRYLEILTGKRKYY
HGPGNEKSRTDYGRYRTSGETLDNIFGILIGKCTFYPDEFRAAKASYTAQEFNLLNDLNNLTVPTETKKLSKEQKNQIIN
YVKNEKAMGPAKLFKYIAKLLSCDVADIKGYRIDKSGKAEIHTFEAYRKMKTLETLDIEQMDRETLDKLAYVLTLNTERE
GIQEALEHEFADGSFSQKQVDELVQFRKANSSIFGKGWHNFSVKLMMELIPELYETSEEQMTILTRLGKQKTTSSSNKTK
YIDEKLLTEEIYNPVVAKSVRQAIKIVNAAIKEYGDFDNIVIEMARETNEDDEKKAIQKIQKANKDEKDAAMLKAANQYN
GKAELPHSVFHGHKQLATKIRLWHQQGERCLYTGKTISIHDLINNSNQFEVDHILPLSITFDDSLANKVLVYATANQEKG
QRTPYQALDSMDDAWSFRELKAFVRESKTLSNKKKEYLLTEEDISKFDVRKKFIERNLVDTRYASRVVLNALQEHFRAHK
IDTKVSVVRGQFTSQLRRHWGIEKTRDTYHHHAVDALIIAASSQLNLWKKQKNTLVSYSEDQLLDIETGELISDDEYKES
VFKAPYQHFVDTLKSKEFEDSILFSYQVDSKFNRKISDATIYATRQAKVGKDKADETYVLGKIKDIYTQDGYDAFMKIYK
KDKSKFLMYRHDPQTFEKVIEPILENYPNKQINEKGKEVPCNPFLKYKEEHGYIRKYSKKGNGPEIKSLKYYDSKLGNHI
DITPKDSNNKVVLQSVSPWRADVYFNKTTGKYEILGLKYADLQFEKGTGTYKISQEKYNDIKKKEGVDSDSEFKFTLYKN
DLLLVKDTETKEQQLFRFLSRTMPKQKHYVELKPYDKQKFEGGEALIKVLGNVANSGQCKKGLGKSNISIYKVRTDVLGN
QHIIKNEGDKPKLDFSRADPKKKRKV
Supplemental Table S10. DNA and protein sequences for St1ABEmax LMD9 ORF. Screenshoots of raw chromatograms for data presented in Fig.3

[truncated: 9 more sheets: S11 (sgRNAs), S12 (Promoters (AAV)), S13 (LMD9 targets), S14 (LMG18311 targets), S15 (CNRZ1066 targets), S16 (TH1477 targets), S17 (MTH17CL396 targets), S18 (SaCas9 targets), S19 (PCR primers)]
